# Supplementary material for: How to attract and retain health workers in rural areas of a fragile state: Findings from a labour market survey in Guinea
Source: PubMed Central journal article supplement (PMC8675729; doi:10.1371/journal.pone.0245569), 2021-12-16
Supplement: pone.0245569.s001.pdf [file pone.0245569.s001.pdf]

# Professionnels de santé

---

## A ADMIN

No sub-sections, No rosters, Questions: 13, Variables: 1.

## B CONSENT

No sub-sections, No rosters, Questions: 6, Static texts: 1.

## C IDENTIFICATION

No sub-sections, No rosters, Questions: 3.

## D JOB CHOICES

No sub-sections, No rosters, Questions: 35, Static texts: 21.

## E CURRENT JOB

Sub-sections: 5, No rosters, Questions: 36.

## F PREFERENCES

No sub-sections, No rosters, Questions: 10.

## G JOB HISTORY

No sub-sections, No rosters, Questions: 25, Static texts: 3.

## H INCOME AND EXPENDITURE

Sub-sections: 5, No rosters, Questions: 46, Static texts: 1.

## I ABSENTEEISM

No sub-sections, No rosters, Questions: 10.

## J SATISFACTION AND CONSTRAINTS

Sub-sections: 2, No rosters, Questions: 28.

## K CHARACTERISTICS OF THE RESPONDENT

No sub-sections, No rosters, Questions: 25.

## L END OF INTERVIEW

No sub-sections, No rosters, Questions: 4.

## LEGEND

## A ADMIN

|                                |                                                                                                                                                                                                                                                                                                                                                     |      |
|--------------------------------|-----------------------------------------------------------------------------------------------------------------------------------------------------------------------------------------------------------------------------------------------------------------------------------------------------------------------------------------------------|------|
| ID code of the health facility | TEXT<br>SCOPE: IDENTIFYING<br>.....                                                                                                                                                                                                                                                                                                                 | hfid |
| ID code of the interviewer     | TEXT<br>.....                                                                                                                                                                                                                                                                                                                                       | a1   |
| ID code of the supervisor      | TEXT<br>.....                                                                                                                                                                                                                                                                                                                                       | a2   |
| Interview date                 | DATE: CURRENT TIME<br>.....                                                                                                                                                                                                                                                                                                                         | a3   |
| Name of the health facility    | TEXT<br>.....                                                                                                                                                                                                                                                                                                                                       | a4   |
| Type of health facility        | SINGLE-SELECT<br>a5<br>01 <input type="radio"/> National Hospital<br>02 <input type="radio"/> Regional Hospital<br>03 <input type="radio"/> Prefectural Hospital<br>04 <input type="radio"/> Communal Hospital<br>05 <input type="radio"/> Improved Health Center<br>06 <input type="radio"/> Health Center<br>07 <input type="radio"/> Health Post |      |
| Location of the facility       | SINGLE-SELECT<br>a6<br>01 <input type="radio"/> Urban<br>02 <input type="radio"/> Rural                                                                                                                                                                                                                                                             |      |
| Zone of the facility           | SINGLE-SELECT<br>a7<br>01 <input type="radio"/> Zone 1<br>02 <input type="radio"/> Zone 2<br>03 <input type="radio"/> Zone 3<br>04 <input type="radio"/> Zone 4<br>98 <input type="radio"/> I don't know                                                                                                                                            |      |
| Region of the facility         | SINGLE-SELECT<br>a8<br>01 <input type="radio"/> Boké<br>02 <input type="radio"/> Conakry<br>03 <input type="radio"/> Faranah<br>04 <input type="radio"/> Kankan<br>05 <input type="radio"/> Kindia<br>06 <input type="radio"/> Labé<br>07 <input type="radio"/> Mamou<br>08 <input type="radio"/> Nzérékoré                                         |      |
| Prefectures                    | TEXT<br>.....                                                                                                                                                                                                                                                                                                                                       | a9   |
| Sub-Prefectures                | TEXT<br>.....                                                                                                                                                                                                                                                                                                                                       | a10  |
| Nearest town (geographical)    | TEXT<br>.....                                                                                                                                                                                                                                                                                                                                       | a11  |

|                            |        |       |
|----------------------------|--------|-------|
| GPS coordinates            | GPS    | a12   |
|                            | N      | ----- |
|                            | W      | ----- |
|                            | A      | ----- |
| VARIABLE<br>Quest. IRnd () | DOUBLE | rnd   |

## B CONSENT

STATIC TEXT

*Hello. My name is \_\_\_\_\_ and I am from CERREGUI. We are working with the Ministry of Health, the World Bank and Oxford Policy Management on this health analytical project. We would like to know how you became a health worker, the challenges you face in your daily work, about your motivations and preferences. Your answers will help us better understand your situation as a health worker and we will present the findings to the Ministry of Health. This can help the policy makers design better policies for health workers in Guinea. The interview would take approximately 60 minutes. Participation in this research is voluntary. We will report the findings in a way that nobody will know what you tell me today. We will present the aggregate results without the details of what each patient is telling us. That means that you can be completely honest with us. Of course you can refuse to answer any questions and stop the interview at any time if you wish to. At this point, do you have any questions about the study? Do I have your agreement to proceed?*

|                                                                                                                                                                                                                                                                                                                                                                                                            |                                                                                                                                                                                                                                                                                                                |    |
|------------------------------------------------------------------------------------------------------------------------------------------------------------------------------------------------------------------------------------------------------------------------------------------------------------------------------------------------------------------------------------------------------------|----------------------------------------------------------------------------------------------------------------------------------------------------------------------------------------------------------------------------------------------------------------------------------------------------------------|----|
| <p>I understand that the information I will provide in the questionnaire includes identifiers, so that I can be contacted for clarification. I understand that the identifier information is not used in the analysis; each form will be anonymised and no personal information will be shared with anyone else, but the research team.</p> <p>V1 self==1<br/>M1 EXPLAIN TO RESPONDENT IN SIMPLE TERMS</p> | <p>SINGLE-SELECT</p> <p>01 <input type="radio"/> Yes</p> <p>02 <input type="radio"/> No</p>                                                                                                                                                                                                                    | b1 |
| <p>I understand that my participation is voluntary and that I am free to withdraw at any time without giving any reason, without my medical care or legal rights being affected.</p> <p>V1 self==1<br/>M1 EXPLAIN TO RESPONDENT IN SIMPLE TERMS</p>                                                                                                                                                        | <p>SINGLE-SELECT</p> <p>01 <input type="radio"/> Yes</p> <p>02 <input type="radio"/> No</p>                                                                                                                                                                                                                    | b2 |
| <p>I understand that the information from my interview will be pooled with other participants' responses, anonymised and may be published.</p> <p>V1 self==1<br/>M1 EXPLAIN TO RESPONDENT IN SIMPLE TERMS</p>                                                                                                                                                                                              | <p>SINGLE-SELECT</p> <p>01 <input type="radio"/> Yes</p> <p>02 <input type="radio"/> No</p>                                                                                                                                                                                                                    | b3 |
| <p>Do you want to participate in our survey?</p> <p>E b1==1 &amp;&amp; b2==1 &amp;&amp; b3==1</p>                                                                                                                                                                                                                                                                                                          | <p>SINGLE-SELECT</p> <p>01 <input type="radio"/> Yes</p> <p>02 <input type="radio"/> No</p>                                                                                                                                                                                                                    | b4 |
| <p>If you are not willing to participate in this survey would you please tell us the main reason for not participating in this survey?</p> <p>E b4==2</p>                                                                                                                                                                                                                                                  | <p>SINGLE-SELECT</p> <p>01 <input type="radio"/> Do not have time</p> <p>02 <input type="radio"/> Do not have interest</p> <p>03 <input type="radio"/> Not approved by my superiors</p> <p>04 <input type="radio"/> Do not want to share personal information</p> <p>05 <input type="radio"/> Fear/anxiety</p> | b5 |

- 97  Others, specify  
 98  Don't know

Specify other

TEXT

b5\_oth

E b5==97

## C IDENTIFICATION

Surname and name of the respondent

TEXT

c1

What is your official designation?

SINGLE-SELECT

c2

- 01  Specialist doctor  
 02  Doctor  
 03  Nurse  
 04  Midwife  
 05  ATS

Mobile phone number of the respondent

TEXT

c3

I Enter 000000000 if none

## D JOB CHOICES

STATIC TEXT

*A LIRE: Nous allons maintenant procéder a un exercice au cours duquel vous vous verrez proposer deux postes hypothétiques. Chaque poste a des caractéristiques différentes et vous devrez choisir le poste qui vous parait le meilleur des deux. Puis une sous question vous demandera si, en les conditions actuelles, vous accepteriez en effet le poste en question. D'abord, merci de prendre quelques minutes pour vous familiariser avec les caractéristiques des postes*

STATIC TEXT

**A MONTRER:**

- (1) la feuille avec les différentes caractéristiques en rapport avec le type de travailleur: %c2%  
 (2) L'exemple pour le travailleur %c2%

STATIC TEXT

E (c2==1 || c2 == 2) && rnd<0.5

*Procédure alternative: Veuillez passer la tablette à l'enquêté(e) et faire exemple avec lui/elle*

| <b>Médecins: EXEMPLE</b> |                |                       |
|--------------------------|----------------|-----------------------|
| Caractéristiques         | Poste A        | Poste B               |
| Salaire                  | 6.5 millions   | 2 millions            |
| Localisation             | Conakry        | capitale préfectorale |
| Equipement               | Bon            | Mediocre              |
| Formation                | spécialisation | aucun                 |
| Temps d'affectation      | indéterminée   | indéterminée          |
| Logement                 | logement       | aucun                 |
| Transport                | moto           | aucun                 |

Exemple: faites le choix

SINGLE-SELECT

choice ex

- 01  Job A  
 02  Job B

E (c2==1 || c2 == 2) && rnd<0.5

STATIC TEXT

E rnd>=0.5 || c2==3 || c2 == 4 || c2 == 5

|                          |                                                                      |
|--------------------------|----------------------------------------------------------------------|
| Mettre l'heure de depart | DATE: CURRENT TIME <span style="float: right;">DCE start time</span> |
|--------------------------|----------------------------------------------------------------------|

STATIC TEXT

E (c2==1 || c2 == 2) && rnd<0.5

**Choix Numéro 1**

| Caractéristiques    | Poste A               | Poste B      |
|---------------------|-----------------------|--------------|
| Salaire             | 6.5 millions          | 6.5 millions |
| Localisation        | capitale préfectorale | Conakry      |
| Equipement          | Médiocre              | bon          |
| Formation           | spécialisation        | ateliers     |
| Temps d'affectation | indéterminée          | indéterminée |
| Logement            | aucun                 | aucun        |
| Transport           | moto                  | aucun        |

|                                                     |                                                                                                                                |
|-----------------------------------------------------|--------------------------------------------------------------------------------------------------------------------------------|
| Choice Set Number 1                                 | SINGLE-SELECT <span style="float: right;">choice1</span><br>01 <input type="radio"/> Job A<br>02 <input type="radio"/> Job B   |
| Si vous pouviez avoir ce poste, l'accepteriez-vous? | SINGLE-SELECT <span style="float: right;">choice1 would</span><br>01 <input type="radio"/> oui<br>02 <input type="radio"/> non |

STATIC TEXT

E (c2==1 || c2 == 2) && rnd<0.5

**Choix Numéro 2**

| Caractéristiques    | Poste A               | Poste B                         |
|---------------------|-----------------------|---------------------------------|
| Salaire             | 3.5 millions          | 2 millions                      |
| Localisation        | capitale préfectorale | capitale sous-préfectorale (CS) |
| Equipement          | moyen                 | médiocre                        |
| Formation           | ateliers              | ateliers                        |
| Temps d'affectation | indéterminée          | 5 ans                           |
| Logement            | aucun                 | logement                        |
| Transport           | moto                  | aucun                           |

|                                                     |                                                                                                                                |
|-----------------------------------------------------|--------------------------------------------------------------------------------------------------------------------------------|
| Choice Set Number 2                                 | SINGLE-SELECT <span style="float: right;">choice2</span><br>01 <input type="radio"/> Job A<br>02 <input type="radio"/> Job B   |
| Si vous pouviez avoir ce poste, l'accepteriez-vous? | SINGLE-SELECT <span style="float: right;">choice2 would</span><br>01 <input type="radio"/> oui<br>02 <input type="radio"/> non |

STATIC TEXT

E (c2==1 || c2 == 2) && rnd<0.5

**Choix Numéro 3**

| Caractéristiques    | Poste A        | Poste B               |
|---------------------|----------------|-----------------------|
| Salaire             | 2 millions     | 3.5 millions          |
| Localisation        | Conakry        | capitale préfectorale |
| Equipement          | moyen          | moyen                 |
| Formation           | spécialisation | ateliers              |
| Temps d'affectation | indéterminée   | indéterminée          |
| Logement            | aucun          | logement              |
| Transport           | aucun          | moto                  |

## Choice Set Number 3

SINGLE-SELECT

choice3

- 01  Job A  
02  Job B

Si vous pouviez avoir ce poste, l'accepteriez-vous?

SINGLE-SELECT

choice3\_would

- 01  oui  
02  non

STATIC TEXT

E (c2==1 || c2 == 2) &amp;&amp; rnd&lt;0,5

## Choix Numéro 4

| Caractéristiques    | Poste A               | Poste B                         |
|---------------------|-----------------------|---------------------------------|
| Salaire             | 2 millions            | 6.5 millions                    |
| Localisation        | capitale préfectorale | capitale sous-préfectorale (CS) |
| Equipement          | bon                   | moyen                           |
| Formation           | aucun                 | aucun                           |
| Temps d'affectation | indéterminée          | 5 ans                           |
| Logement            | logement              | aucun                           |
| Transport           | aucun                 | moto                            |

## Choice Set Number 4

SINGLE-SELECT

choice4

- 01  Job A  
02  Job B

Si vous pouviez avoir ce poste, l'accepteriez-vous?

SINGLE-SELECT

choice4\_would

- 01  oui  
02  non

STATIC TEXT

E (c2==1 || c2 == 2) &amp;&amp; rnd&lt;0,5

## Choix Numéro 5

| Caractéristiques    | Poste A      | Poste B                         |
|---------------------|--------------|---------------------------------|
| Salaire             | 3.5 millions | 2 millions                      |
| Localisation        | Conakry      | capitale sous-préfectorale (CS) |
| Equipement          | médiocre     | médiocre                        |
| Formation           | aucun        | ateliers                        |
| Temps d'affectation | indéterminée | indéterminée                    |
| Logement            | aucun        | aucun                           |
| Transport           | aucun        | moto                            |

## Choice Set Number 5

SINGLE-SELECT

choice5

- 01  Job A  
02  Job B

Si vous pouviez avoir ce poste, l'accepteriez-vous?

SINGLE-SELECT

choice5\_would

- 01  oui  
02  non

STATIC TEXT

E (c2==1 || c2 == 2) &amp;&amp; rnd&lt;0,5

## Choix Numéro 6

| Caractéristiques    | Poste A        | Poste B               |
|---------------------|----------------|-----------------------|
| Salaire             | 2 millions     | 2 millions            |
| Localisation        | Conakry        | capitale préfectorale |
| Equipement          | moyen          | bon                   |
| Formation           | spécialisation | aucun                 |
| Temps d'affectation | indéterminée   | indéterminée          |
| Logement            | aucun          | aucun                 |
| Transport           | aucun          | moto                  |

Choice Set Number 6

SINGLE-SELECT

choice6

01  Job A

02  Job B

Si vous pouviez avoir ce poste, l'accepteriez-vous?

SINGLE-SELECT

choice6 would

01  oui

02  non

STATIC TEXT

E (c2==1 || c2 == 2) && rnd<0,5

Choix Numéro 7

| Caractéristiques    | Poste A               | Poste B                         |
|---------------------|-----------------------|---------------------------------|
| Salaire             | 3.5 millions          | 3.5 millions                    |
| Localisation        | capitale préfectorale | capitale sous-préfectorale (CS) |
| Equipement          | moyen                 | bon                             |
| Formation           | ateliers              | spécialisation                  |
| Temps d'affectation | indéterminée          | indéterminée                    |
| Logement            | aucun                 | logement                        |
| Transport           | moto                  | aucun                           |

Choice Set Number 7

SINGLE-SELECT

choice7

01  Job A

02  Job B

Si vous pouviez avoir ce poste, l'accepteriez-vous?

SINGLE-SELECT

choice7 would

01  oui

02  non

STATIC TEXT

E (c2==1 || c2 == 2) && rnd<0,5

Choix Numéro 8

| Caractéristiques    | Poste A                         | Poste B               |
|---------------------|---------------------------------|-----------------------|
| Salaire             | 3.5 millions                    | 2 millions            |
| Localisation        | capitale sous-préfectorale (CS) | capitale préfectorale |
| Equipement          | bon                             | bon                   |
| Formation           | spécialisation                  | aucun                 |
| Temps d'affectation | indéterminée                    | 5 ans                 |
| Logement            | aucun                           | logement              |
| Transport           | aucun                           | moto                  |

Choice Set Number 8

SINGLE-SELECT

choice8

01  Job A

02  Job B

Si vous pouviez avoir ce poste, l'accepteriez-vous?

SINGLE-SELECT

choice8 would

01  oui

02  non

STATIC TEXT

E (c2==1 || c2 == 2) && rnd<0.5

### Choix Numéro 9

| Caractéristiques    | Poste A                         | Poste B        |
|---------------------|---------------------------------|----------------|
| Salaire             | 6.5 millions                    | 2 millions     |
| Localisation        | capitale sous-préfecturale (CS) | Conakry        |
| Équipement          | moyen                           | moyen          |
| Formation           | aucun                           | spécialisation |
| Temps d'affectation | 5 ans                           | indéterminée   |
| Logement            | aucun                           | aucun          |
| Transport           | aucun                           | aucun          |

Choice Set Number 9

SINGLE-SELECT

choice9

- 01  Job A  
02  Job B

Si vous pouviez avoir ce poste, l'accepteriez-vous?

SINGLE-SELECT

choice9\_would

- 01  oui  
02  non

STATIC TEXT

E (c2==1 || c2 == 2) && rnd<0.5

### Choix Numéro 10

| Caractéristiques    | Poste A      | Poste B               |
|---------------------|--------------|-----------------------|
| Salaire             | 6.5 millions | 3.5 millions          |
| Localisation        | Conakry      | capitale préfectorale |
| Équipement          | bon          | moyen                 |
| Formation           | ateliers     | ateliers              |
| Temps d'affectation | indéterminée | 5 ans                 |
| Logement            | aucun        | logement              |
| Transport           | aucun        | aucun                 |

Choice Set Number 10

SINGLE-SELECT

choice10

- 01  Job A  
02  Job B

Si vous pouviez avoir ce poste, l'accepteriez-vous?

SINGLE-SELECT

choice10\_would

- 01  oui  
02  non

STATIC TEXT

E (c2==1 || c2 == 2) && rnd<0.5

### Choix Numéro 11

| Caractéristiques    | Poste A                         | Poste B      |
|---------------------|---------------------------------|--------------|
| Salaire             | 3.5 millions                    | 3.5 millions |
| Localisation        | capitale sous-préfecturale (CS) | Conakry      |
| Équipement          | bon                             | médiocre     |
| Formation           | spécialisation                  | aucun        |
| Temps d'affectation | indéterminée                    | indéterminée |
| Logement            | aucun                           | aucun        |
| Transport           | aucun                           | aucun        |

Choice Set Number 11

SINGLE-SELECT

choice11

- 01  Job A  
02  Job B

Si vous pouviez avoir ce poste, l'accepteriez-vous?

SINGLE-SELECT

choice11\_would

- 01  oui



STATIC TEXT

E (c2==1 || c2 == 2) &amp;&amp; rnd&lt;0.5

**Choix Numéro 12**

| Caractéristiques    | Poste A      | Poste B                         |
|---------------------|--------------|---------------------------------|
| Salaire             | 3.5 millions | 6.5 millions                    |
| Localisation        | Conakry      | capitale sous-préfecturale (CS) |
| Équipement          | médiocre     | moyen                           |
| Formation           | aucun        | aucun                           |
| Temps d'affectation | indéterminée | 5 ans                           |
| Logement            | aucun        | logement                        |
| Transport           | aucun        | aucun                           |

**Choice Set Number 12**

SINGLE-SELECT

choice12

- 01  Job A  
02  Job B

Si vous pouviez avoir ce poste, l'accepteriez-vous?

SINGLE-SELECT

choice12\_would

- 01  oui  
02  non

STATIC TEXT

E (c2==1 || c2 == 2) &amp;&amp; rnd&lt;0.5

**Choix Numéro 13**

| Caractéristiques    | Poste A                         | Poste B               |
|---------------------|---------------------------------|-----------------------|
| Salaire             | 2 millions                      | 2 millions            |
| Localisation        | capitale sous-préfecturale (CS) | capitale préfectorale |
| Équipement          | médiocre                        | bon                   |
| Formation           | ateliers                        | aucun                 |
| Temps d'affectation | indéterminée                    | 5 ans                 |
| Logement            | logement                        | aucun                 |
| Transport           | moto                            | aucun                 |

**Choice Set Number 13**

SINGLE-SELECT

choice13

- 01  Job A  
02  Job B

Si vous pouviez avoir ce poste, l'accepteriez-vous?

SINGLE-SELECT

choice13\_would

- 01  oui  
02  non

STATIC TEXT

E (c2==1 || c2 == 2) &amp;&amp; rnd&lt;0.5

**Choix Numéro 14**

| Caractéristiques    | Poste A                         | Poste B               |
|---------------------|---------------------------------|-----------------------|
| Salaire             | 6.5 millions                    | 3.5 millions          |
| Localisation        | capitale sous-préfecturale (CS) | capitale préfectorale |
| Équipement          | moyen                           | moyen                 |
| Formation           | aucun                           | ateliers              |
| Temps d'affectation | indéterminée                    | 5 ans                 |
| Logement            | logement                        | aucun                 |
| Transport           | moto                            | aucun                 |

**Choice Set Number 14**

SINGLE-SELECT

choice14

- 01  Job A  
02  Job B

Si vous pouviez avoir ce poste, l'accepteriez-vous?

SINGLE-SELECT

choice14\_would

- 01  oui
- 02  non

STATIC TEXT

E (c2==1 || c2 == 2) && rnd<0,5

**Choix Numéro 15**

| Caractéristiques    | Poste A               | Poste B                         |
|---------------------|-----------------------|---------------------------------|
| Salaire             | 6.5 millions          | 6.5 millions                    |
| Localisation        | capitale préfectorale | capitale sous-préfectorale (CS) |
| Equipement          | médiocre              | moyen                           |
| Formation           | spécialisation        | aucun                           |
| Temps d'affectation | 5 ans                 | indéterminée                    |
| Logement            | aucun                 | logement                        |
| Transport           | moto                  | aucun                           |

**Choice Set Number 15**

SINGLE-SELECT

choice15

- 01  Job A
- 02  Job B

Si vous pouviez avoir ce poste, l'accepteriez-vous?

SINGLE-SELECT

choice15\_would

- 01  oui
- 02  non

STATIC TEXT

E (c2==1 || c2 == 2) && rnd<0,5

**Choix Numéro 16**

| Caractéristiques    | Poste A               | Poste B                         |
|---------------------|-----------------------|---------------------------------|
| Salaire             | 6.5 millions          | 3.5 millions                    |
| Localisation        | capitale préfectorale | capitale sous-préfectorale (CS) |
| Equipement          | médiocre              | bon                             |
| Formation           | spécialisation        | spécialisation                  |
| Temps d'affectation | indéterminée          | 5 ans                           |
| Logement            | logement              | aucun                           |
| Transport           | aucun                 | moto                            |

**Choice Set Number 16**

SINGLE-SELECT

choice16

- 01  Job A
- 02  Job B

Si vous pouviez avoir ce poste, l'accepteriez-vous?

SINGLE-SELECT

choice16\_would

- 01  oui
- 02  non

STATIC TEXT

E (c2==1 || c2 == 2) && rnd<0,5

*Merci ! Veuillez rendre la tablette a l'enquêteur*

Mettre l'heure de fin

DATE: CURRENT TIME

DCE end time

.....

**E CURRENT JOB**

E CURRENT JOB

## CURRENT JOB

|                                                                                                                                                                                                                                                                                                                               |                                                                                                                                                                                                                                                                                                                                   |
|-------------------------------------------------------------------------------------------------------------------------------------------------------------------------------------------------------------------------------------------------------------------------------------------------------------------------------|-----------------------------------------------------------------------------------------------------------------------------------------------------------------------------------------------------------------------------------------------------------------------------------------------------------------------------------|
| <p><b>How many years have you worked in your current position in this health facility?</b></p> <p>I Write in completed years. If less than 1 year, write 0.<br/> V1 self.InRange(0,70)<br/> M1 Not in Range, It should be in between 0 to 70. Please confirm &amp; Reenter.</p>                                               | <p>NUMERIC: INTEGER e4</p> <p>-----</p>                                                                                                                                                                                                                                                                                           |
| <p><b>Did you want to be posted in this facility?</b></p>                                                                                                                                                                                                                                                                     | <p>SINGLE-SELECT e5</p> <p>01 <input type="radio"/> Yes<br/> 02 <input type="radio"/> No</p>                                                                                                                                                                                                                                      |
| <p><b>How many years have you worked in this facility?</b></p> <p>I Write in completed years. If less than 1 year, write 0.<br/> V1 self.InRange(0,70)<br/> M1 Not in Range, It should be in between 0 to 70. Please confirm &amp; Reenter.<br/> V2 self&gt;=e4<br/> M2 Cannot be smaller than years in current position.</p> | <p>NUMERIC: INTEGER e1</p> <p>-----</p>                                                                                                                                                                                                                                                                                           |
| <p><b>In how many different positions have you worked in this facility?</b></p> <p>I Write number of positions. If only one position, write 1<br/> V1 self.InRange(1,20)</p>                                                                                                                                                  | <p>NUMERIC: INTEGER e1 1</p> <p>-----</p>                                                                                                                                                                                                                                                                                         |
| <p><b>Are you a permanent or contractual employee?</b></p> <p>I Do not prompt.</p>                                                                                                                                                                                                                                            | <p>SINGLE-SELECT e2</p> <p>01 <input type="radio"/> Public, permanent employee<br/> 02 <input type="radio"/> Contractual staff (municipality)<br/> 03 <input type="radio"/> Contractual staff (health facility)<br/> 04 <input type="radio"/> Contractual staff (NGO/programme-based)</p>                                         |
| <p><b>What would you say is your current function?</b></p>                                                                                                                                                                                                                                                                    | <p>SINGLE-SELECT e3</p> <p>01 <input type="radio"/> Management<br/> 02 <input type="radio"/> Medical/technical role<br/> 03 <input type="radio"/> Support role<br/> 04 <input type="radio"/> Many roles<br/> 97 <input type="radio"/> Others, specify</p>                                                                         |
| <p><b>Specify other</b></p> <p>E e3==97</p>                                                                                                                                                                                                                                                                                   | <p>TEXT e3 oth</p> <p>-----</p>                                                                                                                                                                                                                                                                                                   |
| <p><b>Were you trained in this region?</b></p>                                                                                                                                                                                                                                                                                | <p>SINGLE-SELECT e6</p> <p>01 <input type="radio"/> Yes<br/> 02 <input type="radio"/> No</p>                                                                                                                                                                                                                                      |
| <p><b>Where were you trained?</b></p> <p>E e6==2</p>                                                                                                                                                                                                                                                                          | <p>SINGLE-SELECT e7</p> <p>01 <input type="radio"/> Boké<br/> 02 <input type="radio"/> Conakry<br/> 03 <input type="radio"/> Faranah<br/> 04 <input type="radio"/> Kankan<br/> 05 <input type="radio"/> Kindia<br/> 06 <input type="radio"/> Labé<br/> 07 <input type="radio"/> Mamou<br/> 08 <input type="radio"/> Nzérékoré</p> |
| <p><b>Did you practise in rural areas during the training?</b></p>                                                                                                                                                                                                                                                            | <p>SINGLE-SELECT g6</p> <p>01 <input type="radio"/> Yes<br/> 02 <input type="radio"/> No</p>                                                                                                                                                                                                                                      |

|                                                                                                                                           |                                                                                                                                                                                                                                                                                                                                                                                                                                                                                                                        |
|-------------------------------------------------------------------------------------------------------------------------------------------|------------------------------------------------------------------------------------------------------------------------------------------------------------------------------------------------------------------------------------------------------------------------------------------------------------------------------------------------------------------------------------------------------------------------------------------------------------------------------------------------------------------------|
| <p>Are you sometimes performing tasks which you were not prepared for in health professional training?</p> <p>I Do not prompt.</p>        | <p>SINGLE-SELECT <span style="float: right;">e8</span></p> <p>01 <input type="radio"/> Yes, daily</p> <p>02 <input type="radio"/> Often</p> <p>03 <input type="radio"/> Sometimes</p> <p>04 <input type="radio"/> Never</p> <p>99 <input type="radio"/> Prefer not say</p>                                                                                                                                                                                                                                             |
| <p>Which tasks that you are performing now were you not trained for?</p> <p>I Do not prompt. Select multiple.</p> <p>E e8==1    e8==2</p> | <p>MULTI-SELECT <span style="float: right;">e9</span></p> <p>01 <input type="checkbox"/> Outpatient consultation</p> <p>02 <input type="checkbox"/> Accident and emergency</p> <p>03 <input type="checkbox"/> Minor surgery</p> <p>04 <input type="checkbox"/> Immunization</p> <p>05 <input type="checkbox"/> Maternal health services/ advice</p> <p>06 <input type="checkbox"/> Family planning services/ advice</p> <p>07 <input type="checkbox"/> Pharmacy</p> <p>97 <input type="checkbox"/> Others, specify</p> |
| <p>Specify other</p> <p>E e9.Contains(97)</p>                                                                                             | <p>TEXT <span style="float: right;">e9 oth</span></p> <p>.....</p>                                                                                                                                                                                                                                                                                                                                                                                                                                                     |
| <p>Overall, do you feel well prepared and trained for your current position?</p> <p>I Do not prompt.</p>                                  | <p>SINGLE-SELECT <span style="float: right;">e10</span></p> <p>01 <input type="radio"/> Yes</p> <p>02 <input type="radio"/> Sometimes, I feel overwhelmed</p> <p>03 <input type="radio"/> Not at all</p>                                                                                                                                                                                                                                                                                                               |

E CURRENT JOB  
**ACTIVITIES AND RESPONSIBILITIES**

|                                                                                                                                                                                      |                                                                                                                                                                                                                                                                                                                 |
|--------------------------------------------------------------------------------------------------------------------------------------------------------------------------------------|-----------------------------------------------------------------------------------------------------------------------------------------------------------------------------------------------------------------------------------------------------------------------------------------------------------------|
| <p>Do you consult patients daily?</p>                                                                                                                                                | <p>SINGLE-SELECT <span style="float: right;">e11</span></p> <p>01 <input type="radio"/> Yes, daily</p> <p>02 <input type="radio"/> Often</p> <p>03 <input type="radio"/> Sometimes</p> <p>04 <input type="radio"/> Never</p>                                                                                    |
| <p>Why not?</p> <p>E e11==4</p>                                                                                                                                                      | <p>SINGLE-SELECT <span style="float: right;">e12</span></p> <p>01 <input type="radio"/> Only few patients visit this facility</p> <p>02 <input type="radio"/> I am doing other tasks</p> <p>97 <input type="radio"/> Others, specify</p>                                                                        |
| <p>Specify other</p> <p>E e12==97</p>                                                                                                                                                | <p>TEXT <span style="float: right;">e12oth</span></p> <p>.....</p>                                                                                                                                                                                                                                              |
| <p>On average, how many patients do you consult in a day, when you are at this facility?</p> <p>E e11==1    e11==2    e11==3</p> <p>V1 self.InRange(1,80)</p> <p>M1 Out of range</p> | <p>NUMERIC: INTEGER <span style="float: right;">e13</span></p> <p>-----</p>                                                                                                                                                                                                                                     |
| <p>How do you feel about the number of patients you are seeing in a day?</p> <p>I Prompt.</p> <p>E e11==1    e11==2    e11==3</p>                                                    | <p>SINGLE-SELECT <span style="float: right;">e14</span></p> <p>01 <input type="radio"/> More than I can take care of</p> <p>02 <input type="radio"/> Just enough patients</p> <p>03 <input type="radio"/> Could handle a few more patients</p> <p>04 <input type="radio"/> Could handle a lot more patients</p> |

|                                                                                                 |                                                                                                                                                                                                                                                                                                                                                                      |
|-------------------------------------------------------------------------------------------------|----------------------------------------------------------------------------------------------------------------------------------------------------------------------------------------------------------------------------------------------------------------------------------------------------------------------------------------------------------------------|
| <p>Can you meet the needs of the patients you are consulting?</p> <p>E e11==1    e11==2</p>     | <p>SINGLE-SELECT e15</p> <p>01 <input type="radio"/> Yes</p> <p>02 <input type="radio"/> No</p>                                                                                                                                                                                                                                                                      |
| <p>Why not?</p> <p>I Do not prompt.</p> <p>E (e11==1    e11==2    e11==3) &amp;&amp; e15==2</p> | <p>SINGLE-SELECT e16</p> <p>01 <input type="radio"/> The facility only offers limited services</p> <p>02 <input type="radio"/> Lack of equipment</p> <p>03 <input type="radio"/> Broken equipment</p> <p>04 <input type="radio"/> Insufficient training/skills</p> <p>05 <input type="radio"/> Lack of personnel</p> <p>97 <input type="radio"/> Others, specify</p> |
| <p>Specify other</p> <p>E (e11==1    e11==2    e11==3) &amp;&amp; e16==97</p>                   | <p>TEXT e16oth</p> <p>.....</p>                                                                                                                                                                                                                                                                                                                                      |

E CURRENT JOB  
WORKLOAD

|                                                                                                                                                                              |                                                                                                                                                                                                                          |
|------------------------------------------------------------------------------------------------------------------------------------------------------------------------------|--------------------------------------------------------------------------------------------------------------------------------------------------------------------------------------------------------------------------|
| <p>In a typical week, how many days are you working at this facility?</p> <p>I Write number of days. Write 0 if none.</p> <p>V1 self.InRange(0,7)</p> <p>M1 Out of Range</p> | <p>NUMERIC: INTEGER e17</p> <p>-----</p>                                                                                                                                                                                 |
| <p>Do you feel that your colleagues (same cadre) work roughly the same number of days as you do in a typical week in this facility?</p>                                      | <p>SINGLE-SELECT e18</p> <p>01 <input type="radio"/> They work more</p> <p>02 <input type="radio"/> They work the same</p> <p>03 <input type="radio"/> They work less</p> <p>04 <input type="radio"/> Not applicable</p> |
| <p>In a typical day, how many hours do you work in this facility?</p> <p>I Write the number of hours per day.</p> <p>V1 self.InRange(0,24)</p> <p>M1 Out of Range</p>        | <p>NUMERIC: INTEGER e19</p> <p>-----</p>                                                                                                                                                                                 |
| <p>Do you feel that your colleagues (same cadre) work roughly the same number of hours in a typical day in this facility?</p>                                                | <p>SINGLE-SELECT e20</p> <p>01 <input type="radio"/> They work more</p> <p>02 <input type="radio"/> They work the same</p> <p>03 <input type="radio"/> They work less</p> <p>99 <input type="radio"/> Not applicable</p> |
| <p>Do you feel as if you have sufficient time to complete all the tasks you have to complete?</p>                                                                            | <p>SINGLE-SELECT e21</p> <p>01 <input type="radio"/> Yes</p> <p>02 <input type="radio"/> Sometimes I have trouble completing all</p> <p>03 <input type="radio"/> No, I hardly manage to complete all tasks</p>           |

E CURRENT JOB  
MANAGEMENT AND SUPERVISION

|                                                                                                                                                                                                                                                                                       |                                                                                                 |
|---------------------------------------------------------------------------------------------------------------------------------------------------------------------------------------------------------------------------------------------------------------------------------------|-------------------------------------------------------------------------------------------------|
| <p>Do you feel as if there is a strict hierarchy in your workspace?</p> <p>I Explain 'hierarchy' as: little flexibility, staff in non-management positions has little decision-making power, top down communication from superior, limited opportunities for feedback to superior</p> | <p>SINGLE-SELECT e22</p> <p>01 <input type="radio"/> Yes</p> <p>02 <input type="radio"/> No</p> |
|---------------------------------------------------------------------------------------------------------------------------------------------------------------------------------------------------------------------------------------------------------------------------------------|-------------------------------------------------------------------------------------------------|

Is your supervisor/superior generally present at the health facility you currently work at?

SINGLE-SELECT

e23

- 01  Yes
- 02  No
- 97  I don't know

What do you think would your supervisor/superior do if you did not come to work regularly or took leave without permission for an extended period?

MULTI-SELECT

e24

I Select two.

- 01  Try to find out what is wrong
- 02  Report my behaviour
- 03  Motivate me to improve
- 04  Give a warning/describe the consequences
- 05  Withhold my salary
- 06  Sanctions, public accusation, suspension
- 07  I will lose my job
- 08  Nothing
- 97  Others, specify

Specify other

TEXT

e24oth

E e24.Contains (97)

Do you feel as if your needs and suggestions are being considered by your supervisor/superior?

SINGLE-SELECT

e25

- 01  Yes
- 03  Sometimes
- 02  No
- 97  I don't know

E CURRENT JOB  
REFERRALS AND QUALITY OF SERVICES PROVIDED

Where do you refer patients to, if needed?

SINGLE-SELECT

e26

- 01  National Hospital
- 02  Regional Hospital
- 03  Prefectural Hospital
- 04  Communal Hospital
- 05  Improved Health Center
- 06  Health Center
- 08  Private Clinique

Do you feel that the health facility you are working at meets the demands of the patients?

SINGLE-SELECT

e27

- 01  Yes
- 02  Sometimes
- 03  No

If you could improve one of the following aspects in your health facility, which do you feel is the most important?

SINGLE-SELECT

e28

I Prompt.

- 01  Skills of staff
- 02  Equipment
- 03  Availability of medicine and materials
- 04  Cleanliness and hygiene
- 05  More staff
- 06  Infrastructure
- 97  Others, specify

Specify other

TEXT

e28oth

E e28==97

## F PREFERENCES

|                                                                                                         |                                                                                                                                                                                                                                                                                                                                                                                                                                                                                                                                                                                                                                                        |
|---------------------------------------------------------------------------------------------------------|--------------------------------------------------------------------------------------------------------------------------------------------------------------------------------------------------------------------------------------------------------------------------------------------------------------------------------------------------------------------------------------------------------------------------------------------------------------------------------------------------------------------------------------------------------------------------------------------------------------------------------------------------------|
| <p>What was the main reason for you to become a health worker?</p> <p>I Do not prompt.</p>              | <p>SINGLE-SELECT <span style="float: right;">f1</span></p> <p>01 <input type="radio"/> To have a job</p> <p>02 <input type="radio"/> To keep a job for a long time</p> <p>03 <input type="radio"/> To have a job that pays well</p> <p>04 <input type="radio"/> To access other income opportunities</p> <p>05 <input type="radio"/> To have good social status</p> <p>06 <input type="radio"/> To have a light workload</p> <p>07 <input type="radio"/> To help others</p> <p>08 <input type="radio"/> To continue family tradition</p> <p>09 <input type="radio"/> To have great responsibilities</p> <p>97 <input type="radio"/> Other, specify</p> |
| <p>Specify other</p> <p>E f1==97</p>                                                                    | <p>TEXT <span style="float: right;">f1oth</span></p> <p>.....</p>                                                                                                                                                                                                                                                                                                                                                                                                                                                                                                                                                                                      |
| <p>Would you like a transfer from your current position in the near future? (In the next 1-2 years)</p> | <p>SINGLE-SELECT <span style="float: right;">f2</span></p> <p>01 <input type="radio"/> Yes</p> <p>02 <input type="radio"/> No</p>                                                                                                                                                                                                                                                                                                                                                                                                                                                                                                                      |
| <p>In the longer term (3-5 years), do you plan to change profession?</p>                                | <p>SINGLE-SELECT <span style="float: right;">f4</span></p> <p>01 <input type="radio"/> Yes</p> <p>02 <input type="radio"/> No</p>                                                                                                                                                                                                                                                                                                                                                                                                                                                                                                                      |
| <p>What is the reason for this?</p> <p>E f4==1</p>                                                      | <p>SINGLE-SELECT <span style="float: right;">f5</span></p> <p>01 <input type="radio"/> Better income/salary</p> <p>02 <input type="radio"/> Better career options</p> <p>03 <input type="radio"/> I do not like my work</p> <p>04 <input type="radio"/> Less stress</p> <p>05 <input type="radio"/> Less responsibilities</p> <p>97 <input type="radio"/> Other, specify</p>                                                                                                                                                                                                                                                                           |
| <p>Specify other</p> <p>E f5==97</p>                                                                    | <p>TEXT <span style="float: right;">f5 oth</span></p> <p>.....</p>                                                                                                                                                                                                                                                                                                                                                                                                                                                                                                                                                                                     |
| <p>In the longer term, would you prefer working in urban or rural areas?</p>                            | <p>SINGLE-SELECT <span style="float: right;">f3</span></p> <p>01 <input type="radio"/> Urban</p> <p>02 <input type="radio"/> Rural</p>                                                                                                                                                                                                                                                                                                                                                                                                                                                                                                                 |
| <p>In the longer term, which sector would you prefer to work in?</p> <p>E f4==2</p>                     | <p>SINGLE-SELECT <span style="float: right;">f6</span></p> <p>01 <input type="radio"/> Public sector/ government</p> <p>02 <input type="radio"/> Private sector</p> <p>03 <input type="radio"/> NGO sector</p> <p>04 <input type="radio"/> Faith based sector</p>                                                                                                                                                                                                                                                                                                                                                                                      |
| <p>In the longer term, in which level of facility you would you prefer to work?</p> <p>E f4==2</p>      | <p>SINGLE-SELECT <span style="float: right;">f7</span></p> <p>01 <input type="radio"/> National Hospital</p> <p>02 <input type="radio"/> Regional Hospital</p> <p>03 <input type="radio"/> Prefectural Hospital</p> <p>04 <input type="radio"/> Communal Hospital</p> <p>05 <input type="radio"/> Improved Health Center</p> <p>06 <input type="radio"/> Health Center</p> <p>07 <input type="radio"/> Health Post</p>                                                                                                                                                                                                                                 |
| <p>In the longer term, do you plan to migrate abroad?</p>                                               | <p>SINGLE-SELECT <span style="float: right;">f8</span></p> <p>01 <input type="radio"/> Yes</p> <p>02 <input type="radio"/> No</p>                                                                                                                                                                                                                                                                                                                                                                                                                                                                                                                      |

## G JOB HISTORY

|                                                                                                                                                                                                   |                                                                                              |
|---------------------------------------------------------------------------------------------------------------------------------------------------------------------------------------------------|----------------------------------------------------------------------------------------------|
| <p>How many years have you worked in your profession in total?</p> <p>I Write in completed years. If less than 1 year, write 0.<br/> V1 self.InRange(0,70)<br/> M1 Out of range.</p>              | <p>NUMERIC: INTEGER g1</p> <p>-----</p>                                                      |
| <p>Have you worked as a health professional outside of Guinea?</p>                                                                                                                                | <p>SINGLE-SELECT g2</p> <p>01 <input type="radio"/> Yes<br/> 02 <input type="radio"/> No</p> |
| <p>For how many years?</p> <p>I Write in completed years. If less than 1 year, write 0.<br/> E g2==1<br/> V1 self.InRange(0,70)<br/> M1 Out of Range</p>                                          | <p>NUMERIC: INTEGER g3</p> <p>-----</p>                                                      |
| <p>Where?</p> <p>I If more than one country, write country that respondent has worked in the longest time<br/> E g2==1</p>                                                                        | <p>TEXT g4</p> <p>-----</p>                                                                  |
| <p>How many years have you worked in your profession in Guinea?</p> <p>I Write in completed years. If less than 1 year, write 0.<br/> E g2==1<br/> V1 self.InRange(0,70)<br/> M1 Out of Range</p> | <p>NUMERIC: INTEGER g5</p> <p>-----</p>                                                      |

STATIC TEXT

*Training history*

|                                                                                                                          |                                                                                              |
|--------------------------------------------------------------------------------------------------------------------------|----------------------------------------------------------------------------------------------|
| <p>Are you currently working close to the area, where you received your training/education as a health professional?</p> | <p>SINGLE-SELECT g7</p> <p>01 <input type="radio"/> Yes<br/> 02 <input type="radio"/> No</p> |
| <p>Are you currently working close to the area, where you grew up?</p>                                                   | <p>SINGLE-SELECT g8</p> <p>01 <input type="radio"/> Yes<br/> 02 <input type="radio"/> No</p> |

STATIC TEXT

*Enumerator to give examples of urban and rural areas. Ensure respondent understands categories*

|                                                                                                                                                          |                                                                                               |
|----------------------------------------------------------------------------------------------------------------------------------------------------------|-----------------------------------------------------------------------------------------------|
| <p>Have you worked in health facilities in urban areas?</p>                                                                                              | <p>SINGLE-SELECT g9</p> <p>01 <input type="radio"/> Yes<br/> 02 <input type="radio"/> No</p>  |
| <p>For how many years?</p> <p>I Write in completed years. If less than 1 year, write 0.<br/> E g9==1<br/> V1 self.InRange(0,70)<br/> M1 Out of Range</p> | <p>NUMERIC: INTEGER g10</p> <p>-----</p>                                                      |
| <p>Have you worked in health facilities in rural areas?</p>                                                                                              | <p>SINGLE-SELECT g11</p> <p>01 <input type="radio"/> Yes<br/> 02 <input type="radio"/> No</p> |
| <p>For how many years?</p> <p>I Write in completed years. If less than 1 year, write 0.</p>                                                              | <p>NUMERIC: INTEGER g12</p> <p>-----</p>                                                      |



E g11==1  
V1 self.InRange(0,70)  
M1 Out of Range

STATIC TEXT

*Enumerator to give local examples of national hospital, regional, prefectural and communal hospitals, health centres and health posts, the respondent can relate to. Ensure respondent understands categories.*

|                                                                                                                                                        |                                                                                           |
|--------------------------------------------------------------------------------------------------------------------------------------------------------|-------------------------------------------------------------------------------------------|
| <p>Have you worked in one of the national hospitals?</p>                                                                                               | <p>SINGLE-SELECT g13<br/>01 <input type="radio"/> Yes<br/>02 <input type="radio"/> No</p> |
| <p>For how many years?</p> <p>I Write in completed years. If less than 1 year, write 0.<br/>E g13==1<br/>V1 self.InRange(0,70)<br/>M1 Out of Range</p> | <p>NUMERIC: INTEGER g14<br/>-----</p>                                                     |
| <p>Have you worked in regional hospitals?</p>                                                                                                          | <p>SINGLE-SELECT g15<br/>01 <input type="radio"/> Yes<br/>02 <input type="radio"/> No</p> |
| <p>For how many years?</p> <p>I Write in completed years. If less than 1 year, write 0.<br/>E g15==1<br/>V1 self.InRange(0,70)<br/>M1 Out of Range</p> | <p>NUMERIC: INTEGER g16<br/>-----</p>                                                     |
| <p>Have you worked in prefectural hospitals or communal hospitals?</p>                                                                                 | <p>SINGLE-SELECT g17<br/>01 <input type="radio"/> Yes<br/>02 <input type="radio"/> No</p> |
| <p>For how many years?</p> <p>I Write in completed years. If less than 1 year, write 0.<br/>E g17==1<br/>V1 self.InRange(0,70)<br/>M1 Out of Range</p> | <p>NUMERIC: INTEGER g18<br/>-----</p>                                                     |
| <p>Have you worked in health centres?</p>                                                                                                              | <p>SINGLE-SELECT g19<br/>01 <input type="radio"/> Yes<br/>02 <input type="radio"/> No</p> |
| <p>For how many years?</p> <p>I Write in completed years. If less than 1 year, write 0.<br/>E g19==1<br/>V1 self.InRange(0,70)<br/>M1 Out of Range</p> | <p>NUMERIC: INTEGER g20<br/>-----</p>                                                     |
| <p>Have you worked in a health post?</p>                                                                                                               | <p>SINGLE-SELECT g21<br/>01 <input type="radio"/> Yes<br/>02 <input type="radio"/> No</p> |
| <p>For how many years?</p> <p>I Write in completed years. If less than 1 year, write 0.<br/>E g21==1<br/>V1 self.InRange(0,70)<br/>M1 Out of Range</p> | <p>NUMERIC: INTEGER g22<br/>-----</p>                                                     |
| <p>How many times have you changed health facility since you started to work in your</p>                                                               | <p>NUMERIC: INTEGER g23<br/>-----</p>                                                     |

|                                                                                                                   |                                                                                  |
|-------------------------------------------------------------------------------------------------------------------|----------------------------------------------------------------------------------|
| profession?                                                                                                       |                                                                                  |
| I Write number of transfers. If no transfers, write 0                                                             |                                                                                  |
| How many times have you changed position since you started to work in your profession?                            | NUMERIC: INTEGER g24<br>-----                                                    |
| I Write number of transfers. If no transfers, write 0                                                             |                                                                                  |
| Have you worked in private health facilities?                                                                     | SINGLE-SELECT g25<br>01 <input type="radio"/> Yes<br>02 <input type="radio"/> No |
| For how many years?                                                                                               | NUMERIC: INTEGER g26<br>-----                                                    |
| I Write in completed years. If less than 1 year, write 0.<br>E g25==1<br>V1 self.InRange(0,70)<br>M1 Out of Range |                                                                                  |

## H INCOME AND EXPENDITURE

### H INCOME AND EXPENDITURE INCOME

|                                                                                                                                                                       |                              |
|-----------------------------------------------------------------------------------------------------------------------------------------------------------------------|------------------------------|
| What is your <u>gross salary</u> per month?                                                                                                                           | NUMERIC: INTEGER h1<br>----- |
| I Record from payslip. Exclude all additional payments. Enter value in thousand GNF 99998 I don't know<br>V1 self.InRange(0,20000)    self==99998<br>M1 Out of Range  |                              |
| What is your <u>net (take home) salary</u> per month?                                                                                                                 | NUMERIC: INTEGER h2<br>----- |
| I Record from pay slip. Exclude all additional payments. Enter value in thousand GNF 99998 I don't know<br>V1 self.InRange(0,20000)    self==99998<br>M1 Out of Range |                              |

#### STATIC TEXT

*In a normal month, how much do you receive of the following official, additional payments?*

#### **INSTRUCTION**

*Enter value in thousand GNF. Record from payslip  
Enter '0' if none*

|                                                                    |                              |
|--------------------------------------------------------------------|------------------------------|
| Transport allowance                                                | NUMERIC: INTEGER h7<br>----- |
| V1 self.InRange(0,2000)<br>M1 Out of Range                         |                              |
| Housing allowance                                                  | NUMERIC: INTEGER h6<br>----- |
| V1 self.InRange(0,2000)<br>M1 Out of Range                         |                              |
| Other allowances (e.g. uniform allowance, medical allowance, etc.) | NUMERIC: INTEGER h8<br>----- |
| V1 self.InRange(0,2000)<br>M1 Out of Range                         |                              |

|                                                                                                                                                                                         |                                          |
|-----------------------------------------------------------------------------------------------------------------------------------------------------------------------------------------|------------------------------------------|
| <p>Risk premium payments</p> <p>V1 self.InRange(0,2000)<br/>M1 Out of Range</p>                                                                                                         | <p>NUMERIC: INTEGER h10</p> <p>-----</p> |
| <p>Per diem payments</p> <p>V1 self.InRange(0,2000)<br/>M1 Out of Range</p>                                                                                                             | <p>NUMERIC: INTEGER h12</p> <p>-----</p> |
| <p>Performance based payments</p> <p>V1 self.InRange(0,2000)<br/>M1 Out of range</p>                                                                                                    | <p>NUMERIC: INTEGER h14</p> <p>-----</p> |
| <p>Other, official payments (e.g rural hardship compensation, etc.)</p> <p>V1 self.InRange(0,2000)<br/>M1 Out of range</p>                                                              | <p>NUMERIC: INTEGER h15</p> <p>-----</p> |
| <p>Specify other payment</p> <p>E h15&gt;0</p>                                                                                                                                          | <p>TEXT h16</p> <p>-----</p>             |
| <p>During the last 12 months, how many times did you receive your salary late?</p> <p>I Write 0 if salary was always received on time<br/>V1 self.InRange(0,12)<br/>M1 Out of Range</p> | <p>NUMERIC: INTEGER h4</p> <p>-----</p>  |
| <p>During the last 12 months, how often did you NOT receive your salary AT ALL?</p> <p>I Write 0 if salary was ALWAYS received<br/>V1 self.InRange(0,12)<br/>M1 Out of Range</p>        | <p>NUMERIC: INTEGER h5</p> <p>-----</p>  |

H INCOME AND EXPENDITURE  
USER FEES AND PRIVATE PRACTISE INCOME

|                                                                                                                                                     |                                                                                                                                                                                     |
|-----------------------------------------------------------------------------------------------------------------------------------------------------|-------------------------------------------------------------------------------------------------------------------------------------------------------------------------------------|
| <p>Is it a common practice to be paid by the patients, after delivering a service, when working in a public health facility?</p>                    | <p>SINGLE-SELECT h17</p> <p>01 <input type="radio"/> Yes<br/>02 <input type="radio"/> No</p>                                                                                        |
| <p>Are prices listed somewhere for the patient to see? (e.g. a price list for services on a wall or a sheet of paper)</p> <p>E h17==1</p>           | <p>SINGLE-SELECT h17a</p> <p>01 <input type="radio"/> Yes<br/>03 <input type="radio"/> Some<br/>02 <input type="radio"/> No</p>                                                     |
| <p>Are patients informed in advance (before receiving the services) about the payments?</p> <p>E h17==1</p>                                         | <p>SINGLE-SELECT h17b</p> <p>01 <input type="radio"/> Yes<br/>02 <input type="radio"/> No</p>                                                                                       |
| <p>Is it a common practice to be paid by the patients, in order to deliver better or faster services, when working in a public health facility?</p> | <p>SINGLE-SELECT h17c</p> <p>01 <input type="radio"/> Yes<br/>03 <input type="radio"/> Sometimes<br/>02 <input type="radio"/> No<br/>98 <input type="radio"/> Prefer not to say</p> |
| <p>In a typical week, how much income do you think a health worker can receive from patient</p>                                                     | <p>NUMERIC: INTEGER h18</p> <p>-----</p>                                                                                                                                            |

|                                                                                                                                                                                                                                    |                                                                                                                                                                                                                                                                                       |
|------------------------------------------------------------------------------------------------------------------------------------------------------------------------------------------------------------------------------------|---------------------------------------------------------------------------------------------------------------------------------------------------------------------------------------------------------------------------------------------------------------------------------------|
| <p>payments received in a public health facility?</p> <p>I Enter value in thousand GNF<br/>E h17==1<br/>V1 self.InRange(0,5000)<br/>M1 Out of Range</p>                                                                            |                                                                                                                                                                                                                                                                                       |
| <p>How do you feel about patient payments in public health facilities?</p> <p>I Do not prompt.<br/>E h17==1</p>                                                                                                                    | <p>SINGLE-SELECT h19</p> <p>01 <input type="radio"/> Uncomfortable<br/>02 <input type="radio"/> Accepted<br/>03 <input type="radio"/> Comfortable<br/>97 <input type="radio"/> Others, specify</p>                                                                                    |
| <p>Specify other</p> <p>E h17==1 &amp;&amp; h19==97</p>                                                                                                                                                                            | <p>TEXT h19oth</p> <p>.....</p>                                                                                                                                                                                                                                                       |
| <p>Is it a common practice to receive gifts from patients in public health facilities?</p>                                                                                                                                         | <p>SINGLE-SELECT h20</p> <p>01 <input type="radio"/> Yes<br/>02 <input type="radio"/> No</p>                                                                                                                                                                                          |
| <p>Which kind of gifts do patients bring for health professionals working in public health facilities?</p> <p>I DO NOT PROMPT, SELECT ALL THAT APPLIES<br/>E h20==1</p>                                                            | <p>MULTI-SELECT h21</p> <p>01 <input type="checkbox"/> Vegetables/Staples/Fruit/Meat/Dairy<br/>02 <input type="checkbox"/> Fabric<br/>03 <input type="checkbox"/> Airtime vouchers<br/>04 <input type="checkbox"/> Cosmetics/Soap<br/>97 <input type="checkbox"/> Others, specify</p> |
| <p>Specify other</p> <p>E h20==1 &amp;&amp; h21.Contains(97)</p>                                                                                                                                                                   | <p>TEXT h21oth</p> <p>.....</p>                                                                                                                                                                                                                                                       |
| <p>How do you feel about gift giving in public health facilities?</p> <p>I Do not prompt.<br/>E h20==1</p>                                                                                                                         | <p>SINGLE-SELECT h23</p> <p>01 <input type="radio"/> Uncomfortable<br/>02 <input type="radio"/> Accepted<br/>03 <input type="radio"/> Comfortable<br/>97 <input type="radio"/> Others, specify</p>                                                                                    |
| <p>Specify other</p> <p>E h23==97</p>                                                                                                                                                                                              | <p>TEXT h23oth</p> <p>.....</p>                                                                                                                                                                                                                                                       |
| <p>Is it a common practice to privately consult patients outside of work hours?</p>                                                                                                                                                | <p>SINGLE-SELECT h24</p> <p>01 <input type="radio"/> Yes<br/>02 <input type="radio"/> No</p>                                                                                                                                                                                          |
| <p>In a typical week, how much income do you think a health worker can receive from having a private practice outside of work hours?</p> <p>I Enter value in GNF<br/>E h24==1<br/>V1 self.InRange(0,50000)<br/>M1 Out of Range</p> | <p>NUMERIC: INTEGER h25</p> <p>-----</p>                                                                                                                                                                                                                                              |

H INCOME AND EXPENDITURE  
**ADDITIONAL INCOME GENERATION**

|                                                                                                                                                       |                                                                                              |
|-------------------------------------------------------------------------------------------------------------------------------------------------------|----------------------------------------------------------------------------------------------|
| <p>Is it a common practice to pursue non-health related income-generating activities, such as farming in addition to being a health professional?</p> | <p>SINGLE-SELECT h26</p> <p>01 <input type="radio"/> Yes<br/>02 <input type="radio"/> No</p> |
|                                                                                                                                                       | <p>SINGLE-SELECT h27</p>                                                                     |

|                                                                                                                                                                                                                                                             |                                                                                                                                                                                                                                                                                                                  |
|-------------------------------------------------------------------------------------------------------------------------------------------------------------------------------------------------------------------------------------------------------------|------------------------------------------------------------------------------------------------------------------------------------------------------------------------------------------------------------------------------------------------------------------------------------------------------------------|
| <p>How important do you think is the health-related income generated at the public health facility in comparison to other sources of income, such as farming or having a private practice for the household of the health professional?</p> <p>E h26==1</p> | <p>01 <input type="radio"/> It is the main source of income<br/> 02 <input type="radio"/> Other income generating activities such as farming or private practice income are the main source of income<br/> 03 <input type="radio"/> They are equally important<br/> 97 <input type="radio"/> Others, specify</p> |
| <p>Specify other</p> <p>E h27==97</p>                                                                                                                                                                                                                       | <p>TEXT h27oth</p> <p>.....</p>                                                                                                                                                                                                                                                                                  |

H INCOME AND EXPENDITURE  
HOUSEHOLD FINANCE

|                                                                                                                                                                           |                                                                                                                                                                                                                                                                                                                                                                                                                                                    |
|---------------------------------------------------------------------------------------------------------------------------------------------------------------------------|----------------------------------------------------------------------------------------------------------------------------------------------------------------------------------------------------------------------------------------------------------------------------------------------------------------------------------------------------------------------------------------------------------------------------------------------------|
| <p>Are you married or live with your partner?</p>                                                                                                                         | <p>SINGLE-SELECT h28</p> <p>01 <input type="radio"/> Yes<br/> 02 <input type="radio"/> No</p>                                                                                                                                                                                                                                                                                                                                                      |
| <p>Is your spouse self-employed or earns a salary?</p> <p>E h28==1</p>                                                                                                    | <p>SINGLE-SELECT h30</p> <p>01 <input type="radio"/> Self-employed<br/> 02 <input type="radio"/> Salary<br/> 03 <input type="radio"/> No, spouse does not work</p>                                                                                                                                                                                                                                                                                 |
| <p>How much money does your spouse make in a week?</p> <p>I Enter value in thousand GNF 99998 I don't know<br/> E h30==1<br/> V1 self.InRange(0,1250)    self==99998</p>  | <p>NUMERIC: INTEGER h31</p> <p>-----</p>                                                                                                                                                                                                                                                                                                                                                                                                           |
| <p>How much money does your spouse make in a month?</p> <p>I Enter value in thousand GNF 99998 I don't know<br/> E h30==2<br/> V1 self.InRange(0,5000)    self==99998</p> | <p>NUMERIC: INTEGER h32</p> <p>-----</p>                                                                                                                                                                                                                                                                                                                                                                                                           |
| <p>How many other household members contribute to your household's monthly income?</p> <p>V1 self.InRange(0,21)<br/> M1 Out of Range</p>                                  | <p>NUMERIC: INTEGER h29</p> <p>-----</p>                                                                                                                                                                                                                                                                                                                                                                                                           |
| <p>How many financial dependents live in the household?</p> <p>V1 self.InRange(0,40)</p>                                                                                  | <p>NUMERIC: INTEGER h34</p> <p>-----</p>                                                                                                                                                                                                                                                                                                                                                                                                           |
| <p>What is your household's largest bulk expense?</p> <p>I Definition life-cycle events. DO NOT PROMPT</p>                                                                | <p>SINGLE-SELECT h35</p> <p>01 <input type="radio"/> School fees/uniforms<br/> 02 <input type="radio"/> Life cycle events<br/> 03 <input type="radio"/> Medicine/medical fees<br/> 04 <input type="radio"/> Agricultural inputs<br/> 05 <input type="radio"/> Food<br/> 06 <input type="radio"/> Rent<br/> 07 <input type="radio"/> Transport<br/> 98 <input type="radio"/> Don't want to respond<br/> 97 <input type="radio"/> Other, specify</p> |
| <p>Specify other</p> <p>E h35==97</p>                                                                                                                                     | <p>TEXT h35oth</p> <p>.....</p>                                                                                                                                                                                                                                                                                                                                                                                                                    |

|                                                                            |                                                                                                                                                                                                                                                                                                                                                                                                                                                                                                                                                             |
|----------------------------------------------------------------------------|-------------------------------------------------------------------------------------------------------------------------------------------------------------------------------------------------------------------------------------------------------------------------------------------------------------------------------------------------------------------------------------------------------------------------------------------------------------------------------------------------------------------------------------------------------------|
| <p>How do you mainly pay for this bulk expense?</p> <p>I DO NOT PROMPT</p> | <p>SINGLE-SELECT <span style="float: right;">h36</span></p> <p>01 <input type="radio"/> Loan: family/friends</p> <p>02 <input type="radio"/> Loan: advance from work</p> <p>03 <input type="radio"/> Savings</p> <p>04 <input type="radio"/> Selling an asset</p> <p>05 <input type="radio"/> Can cover with monthly salary</p> <p>06 <input type="radio"/> Reduction of expenses</p> <p>07 <input type="radio"/> Loan from financial institution</p> <p>99 <input type="radio"/> Don't want to respond</p> <p>97 <input type="radio"/> Others, specify</p> |
|----------------------------------------------------------------------------|-------------------------------------------------------------------------------------------------------------------------------------------------------------------------------------------------------------------------------------------------------------------------------------------------------------------------------------------------------------------------------------------------------------------------------------------------------------------------------------------------------------------------------------------------------------|

|                                       |                                                                    |
|---------------------------------------|--------------------------------------------------------------------|
| <p>Specify other</p> <p>E h36==97</p> | <p>TEXT <span style="float: right;">h36oth</span></p> <p>.....</p> |
|---------------------------------------|--------------------------------------------------------------------|

|                                                                                                    |                                                                                                                                                                                                                                                                                         |
|----------------------------------------------------------------------------------------------------|-----------------------------------------------------------------------------------------------------------------------------------------------------------------------------------------------------------------------------------------------------------------------------------------|
| <p>Does your household manage to meet these basic expenses every week?</p> <p>I Do not prompt.</p> | <p>SINGLE-SELECT <span style="float: right;">h37</span></p> <p>01 <input type="radio"/> Yes, always</p> <p>02 <input type="radio"/> Most of the time</p> <p>03 <input type="radio"/> Rarely</p> <p>04 <input type="radio"/> Never</p> <p>99 <input type="radio"/> Prefer not to say</p> |
|----------------------------------------------------------------------------------------------------|-----------------------------------------------------------------------------------------------------------------------------------------------------------------------------------------------------------------------------------------------------------------------------------------|

H INCOME AND EXPENDITURE  
HOUSING AND TRANSPORTATION

|                                                                                                                                                             |                                                                             |
|-------------------------------------------------------------------------------------------------------------------------------------------------------------|-----------------------------------------------------------------------------|
| <p>How many days of annual leave do you have in a year?</p> <p>I Write the number of days per year.</p> <p>V1 self.InRange(0,90)</p> <p>M1 Out of Range</p> | <p>NUMERIC: INTEGER <span style="float: right;">h38</span></p> <p>-----</p> |
|-------------------------------------------------------------------------------------------------------------------------------------------------------------|-----------------------------------------------------------------------------|

|                                                            |                                                                                                                                    |
|------------------------------------------------------------|------------------------------------------------------------------------------------------------------------------------------------|
| <p>As part of your job, are you provided with housing?</p> | <p>SINGLE-SELECT <span style="float: right;">h39</span></p> <p>01 <input type="radio"/> Yes</p> <p>02 <input type="radio"/> No</p> |
|------------------------------------------------------------|------------------------------------------------------------------------------------------------------------------------------------|

|                                                                                       |                                                                                                                                                                                                                                                                 |
|---------------------------------------------------------------------------------------|-----------------------------------------------------------------------------------------------------------------------------------------------------------------------------------------------------------------------------------------------------------------|
| <p>How do you rate the quality of the housing?</p> <p>I Read out.</p> <p>E h39==1</p> | <p>SINGLE-SELECT <span style="float: right;">h40</span></p> <p>01 <input type="radio"/> Excellent</p> <p>02 <input type="radio"/> Good</p> <p>03 <input type="radio"/> Decent</p> <p>04 <input type="radio"/> Poor</p> <p>05 <input type="radio"/> Terrible</p> |
|---------------------------------------------------------------------------------------|-----------------------------------------------------------------------------------------------------------------------------------------------------------------------------------------------------------------------------------------------------------------|

|                                                                                                                                                                                                     |                                                                             |
|-----------------------------------------------------------------------------------------------------------------------------------------------------------------------------------------------------|-----------------------------------------------------------------------------|
| <p>In a normal week, how often do you sleep in the housing that has been provided?</p> <p>I Write number of nights per week.</p> <p>E h39==1</p> <p>V1 self.InRange(0,7)</p> <p>M1 Out of range</p> | <p>NUMERIC: INTEGER <span style="float: right;">h41</span></p> <p>-----</p> |
|-----------------------------------------------------------------------------------------------------------------------------------------------------------------------------------------------------|-----------------------------------------------------------------------------|

|                                                                                  |                                                                                                                                    |
|----------------------------------------------------------------------------------|------------------------------------------------------------------------------------------------------------------------------------|
| <p>Do you use a mode of transportation to carry out your job? Motorbike/car.</p> | <p>SINGLE-SELECT <span style="float: right;">h42</span></p> <p>01 <input type="radio"/> Yes</p> <p>02 <input type="radio"/> No</p> |
|----------------------------------------------------------------------------------|------------------------------------------------------------------------------------------------------------------------------------|

|                                                                                                                            |                                                                                                                                                                                                           |
|----------------------------------------------------------------------------------------------------------------------------|-----------------------------------------------------------------------------------------------------------------------------------------------------------------------------------------------------------|
| <p>Do you get sufficient fuel/ funds for fuel from your facility to use a motorbike for work purposes?</p> <p>E h42==1</p> | <p>SINGLE-SELECT <span style="float: right;">h43</span></p> <p>01 <input type="radio"/> Yes, always</p> <p>02 <input type="radio"/> Most of the time</p> <p>03 <input type="radio"/> Rarely, or never</p> |
|----------------------------------------------------------------------------------------------------------------------------|-----------------------------------------------------------------------------------------------------------------------------------------------------------------------------------------------------------|

I ABSENTEEISM

|                                                                                                                                                                                                                              |                                                                                                                                                                                                                                                                                                                                                                                                                                                                                                                                                                                                                                               |
|------------------------------------------------------------------------------------------------------------------------------------------------------------------------------------------------------------------------------|-----------------------------------------------------------------------------------------------------------------------------------------------------------------------------------------------------------------------------------------------------------------------------------------------------------------------------------------------------------------------------------------------------------------------------------------------------------------------------------------------------------------------------------------------------------------------------------------------------------------------------------------------|
| <p>On any given day, do you feel that many of your co-workers are absent from work in this facility?</p> <p>I Many: more than 1/4.</p>                                                                                       | <p>SINGLE-SELECT <span style="float: right;">i1</span></p> <p>01 <input type="radio"/> Yes</p> <p>02 <input type="radio"/> No</p> <p>99 <input type="radio"/> Prefer not to say</p>                                                                                                                                                                                                                                                                                                                                                                                                                                                           |
| <p>In any given month, on average, how many days do you think your co-workers are absent in this facility?</p> <p>I 99998 Don't know</p> <p>V1 self.InRange(0,30)    self==99998</p> <p>M1 Out of Range</p>                  | <p>NUMERIC: INTEGER <span style="float: right;">i2</span></p> <p>-----</p>                                                                                                                                                                                                                                                                                                                                                                                                                                                                                                                                                                    |
| <p>What would you say is the main reason?</p> <p>I DO NOT PROMPT</p>                                                                                                                                                         | <p>SINGLE-SELECT <span style="float: right;">i3</span></p> <p>00001 <input type="radio"/> Travelling to work takes too long</p> <p>00002 <input type="radio"/> Sickness</p> <p>00003 <input type="radio"/> Sick relatives/family</p> <p>00004 <input type="radio"/> Other jobs (non-health related)</p> <p>00005 <input type="radio"/> Private practice</p> <p>00006 <input type="radio"/> Family related reasons</p> <p>00007 <input type="radio"/> Household obligations</p> <p>00008 <input type="radio"/> Tired from previous days</p> <p>00097 <input type="radio"/> Others, specify</p> <p>99998 <input type="radio"/> I don't know</p> |
| <p>Specify other</p> <p>E i3==97</p>                                                                                                                                                                                         | <p>TEXT <span style="float: right;">i3oth</span></p> <p>-----</p>                                                                                                                                                                                                                                                                                                                                                                                                                                                                                                                                                                             |
| <p>Do you feel as if you worked more days or less days than your co-workers?</p>                                                                                                                                             | <p>SINGLE-SELECT <span style="float: right;">i4</span></p> <p>01 <input type="radio"/> More</p> <p>02 <input type="radio"/> Same</p> <p>03 <input type="radio"/> Less</p> <p>99 <input type="radio"/> Not applicable</p>                                                                                                                                                                                                                                                                                                                                                                                                                      |
| <p>In the last 30 days, were you absent from work because you were sick? How many days?</p> <p>I Enter number of days, enter 0 if 'No'</p> <p>V1 self.InRange(0,30)</p> <p>M1 Out of Range</p>                               | <p>NUMERIC: INTEGER <span style="float: right;">i5</span></p> <p>-----</p>                                                                                                                                                                                                                                                                                                                                                                                                                                                                                                                                                                    |
| <p>In the last 30 days, were you absent from work because of trainings, outreach and authorized leave? How many days?</p> <p>I Enter number of days, enter 0 if 'No'</p> <p>V1 self.InRange(0,30)</p> <p>M1 Out of Range</p> | <p>NUMERIC: INTEGER <span style="float: right;">i6</span></p> <p>-----</p>                                                                                                                                                                                                                                                                                                                                                                                                                                                                                                                                                                    |
| <p>In the last 30 days, how many days were you absent from work because of other, personal reasons?</p> <p>I Enter number of days, enter 0 if 'No'</p> <p>V1 self.InRange(0,30)</p> <p>M1 Out of Range</p>                   | <p>NUMERIC: INTEGER <span style="float: right;">i7</span></p> <p>-----</p>                                                                                                                                                                                                                                                                                                                                                                                                                                                                                                                                                                    |
| <p>What was the reason for your absence from work last time when you were away from work for personal reasons?</p> <p>I Do not prompt.</p>                                                                                   | <p>SINGLE-SELECT <span style="float: right;">i8</span></p> <p>01 <input type="radio"/> Travelling to work took too long</p> <p>02 <input type="radio"/> I was sick</p> <p>03 <input type="radio"/> Sick relatives/family</p>                                                                                                                                                                                                                                                                                                                                                                                                                  |

- 04  I have another job to attend
- 05  Private practice
- 06  I must care for children
- 07  I had household chores
- 08  I was tired from previous day
- 99  Never been away from work for personal reasons
- 97  Others, specify

Specify other

TEXT

i8oth

E i8==97

## J SATISFACTION AND CONSTRAINTS

### J SATISFACTION AND CONSTRAINTS SATISFACTION

|                                                                                    |                                                                                                                                                                                                                                                   |
|------------------------------------------------------------------------------------|---------------------------------------------------------------------------------------------------------------------------------------------------------------------------------------------------------------------------------------------------|
| How satisfied are you with life in general?                                        | <p>SINGLE-SELECT <span style="float: right;">j1a</span></p> <p>01 <input type="radio"/> Very satisfied</p> <p>02 <input type="radio"/> Satisfied</p> <p>03 <input type="radio"/> Unsatisfied</p> <p>04 <input type="radio"/> Very unsatisfied</p> |
| I Read out answer options                                                          |                                                                                                                                                                                                                                                   |
| How satisfied are you with the financial situation of your life?                   | <p>SINGLE-SELECT <span style="float: right;">j1b</span></p> <p>01 <input type="radio"/> Very satisfied</p> <p>02 <input type="radio"/> Satisfied</p> <p>03 <input type="radio"/> Unsatisfied</p> <p>04 <input type="radio"/> Very unsatisfied</p> |
| I Read out answer options                                                          |                                                                                                                                                                                                                                                   |
| How satisfied are you with the working conditions?                                 | <p>SINGLE-SELECT <span style="float: right;">j1d</span></p> <p>01 <input type="radio"/> Very satisfied</p> <p>02 <input type="radio"/> Satisfied</p> <p>03 <input type="radio"/> Unsatisfied</p> <p>04 <input type="radio"/> Very unsatisfied</p> |
| How satisfied are you with the balance between work and leisure time of your life? | <p>SINGLE-SELECT <span style="float: right;">j1c</span></p> <p>01 <input type="radio"/> Very satisfied</p> <p>02 <input type="radio"/> Satisfied</p> <p>03 <input type="radio"/> Unsatisfied</p> <p>04 <input type="radio"/> Very unsatisfied</p> |
| How satisfied are you with the career opportunities of your life?                  | <p>SINGLE-SELECT <span style="float: right;">j1e</span></p> <p>01 <input type="radio"/> Very satisfied</p> <p>02 <input type="radio"/> Satisfied</p> <p>03 <input type="radio"/> Unsatisfied</p> <p>04 <input type="radio"/> Very unsatisfied</p> |

### J SATISFACTION AND CONSTRAINTS MOTIVATIONAL STATEMENTS

|                                                                                                                  |                                                                                                                                                                                                                                             |
|------------------------------------------------------------------------------------------------------------------|---------------------------------------------------------------------------------------------------------------------------------------------------------------------------------------------------------------------------------------------|
| How much do you agree with the followin statements? I have enough opportunities to learn at the health facility. | <p>SINGLE-SELECT <span style="float: right;">j2a</span></p> <p>01 <input type="radio"/> Strongly agree</p> <p>02 <input type="radio"/> Agree</p> <p>03 <input type="radio"/> Disagree</p> <p>04 <input type="radio"/> Strongly disagree</p> |
| I Read out answer options                                                                                        |                                                                                                                                                                                                                                             |
| Career prospectives are fair and promotions are based on performance.                                            | <p>SINGLE-SELECT <span style="float: right;">j2b</span></p> <p>01 <input type="radio"/> Strongly agree</p>                                                                                                                                  |



|                                                                                         |                                                                                                                                                                                                                      |
|-----------------------------------------------------------------------------------------|----------------------------------------------------------------------------------------------------------------------------------------------------------------------------------------------------------------------|
|                                                                                         | 02 <input type="radio"/> Agree<br>03 <input type="radio"/> Disagree<br>04 <input type="radio"/> Strongly disagree                                                                                                    |
| I feel motivated to go to work every day.                                               | SINGLE-SELECT <span style="float: right;">j2c</span><br>01 <input type="radio"/> Strongly agree<br>02 <input type="radio"/> Agree<br>03 <input type="radio"/> Disagree<br>04 <input type="radio"/> Strongly disagree |
| My salary is too low to meet the basic expenses of my family.                           | SINGLE-SELECT <span style="float: right;">j2d</span><br>01 <input type="radio"/> Strongly agree<br>02 <input type="radio"/> Agree<br>03 <input type="radio"/> Disagree<br>04 <input type="radio"/> Strongly disagree |
| Health workers have to ask for payments from patients to make a living.                 | SINGLE-SELECT <span style="float: right;">j2e</span><br>01 <input type="radio"/> Strongly agree<br>02 <input type="radio"/> Agree<br>03 <input type="radio"/> Disagree<br>04 <input type="radio"/> Strongly disagree |
| I worry about being unemployed.                                                         | SINGLE-SELECT <span style="float: right;">j2f</span><br>01 <input type="radio"/> Strongly agree<br>02 <input type="radio"/> Agree<br>03 <input type="radio"/> Disagree<br>04 <input type="radio"/> Strongly disagree |
| We have sufficient drugs and supplies to treat patients.                                | SINGLE-SELECT <span style="float: right;">j2h</span><br>01 <input type="radio"/> Strongly agree<br>02 <input type="radio"/> Agree<br>03 <input type="radio"/> Disagree<br>04 <input type="radio"/> Strongly disagree |
| I worry about being moved to another area.                                              | SINGLE-SELECT <span style="float: right;">j2g</span><br>01 <input type="radio"/> Strongly agree<br>02 <input type="radio"/> Agree<br>03 <input type="radio"/> Disagree<br>04 <input type="radio"/> Strongly disagree |
| We have enough equipment in working condition to treat the patients.                    | SINGLE-SELECT <span style="float: right;">j2i</span><br>01 <input type="radio"/> Strongly agree<br>02 <input type="radio"/> Agree<br>03 <input type="radio"/> Disagree<br>04 <input type="radio"/> Strongly disagree |
| When I do my job well, my opinion of myself improves.                                   | SINGLE-SELECT <span style="float: right;">j2j</span><br>01 <input type="radio"/> Strongly agree<br>02 <input type="radio"/> Agree<br>03 <input type="radio"/> Disagree<br>04 <input type="radio"/> Strongly disagree |
| I work here because the salary reflects each health professional's contribution fairly. | SINGLE-SELECT <span style="float: right;">j2k</span><br>01 <input type="radio"/> Strongly agree<br>02 <input type="radio"/> Agree<br>03 <input type="radio"/> Disagree<br>04 <input type="radio"/> Strongly disagree |
| It is important for me to have opportunities to advance my career.                      | SINGLE-SELECT <span style="float: right;">j2l</span><br>01 <input type="radio"/> Strongly agree<br>02 <input type="radio"/> Agree<br>03 <input type="radio"/> Disagree<br>04 <input type="radio"/> Strongly disagree |

|                                                                             |                                                                                                                                                                                                                                             |
|-----------------------------------------------------------------------------|---------------------------------------------------------------------------------------------------------------------------------------------------------------------------------------------------------------------------------------------|
| I am glad I work in this facility rather than in any other health facility. | <p>SINGLE-SELECT <span style="float: right;">j2m</span></p> <p>01 <input type="radio"/> Strongly agree</p> <p>02 <input type="radio"/> Agree</p> <p>03 <input type="radio"/> Disagree</p> <p>04 <input type="radio"/> Strongly disagree</p> |
| I feel personally responsible if we cannot meet the needs of a patient.     | <p>SINGLE-SELECT <span style="float: right;">j2n</span></p> <p>01 <input type="radio"/> Strongly agree</p> <p>02 <input type="radio"/> Agree</p> <p>03 <input type="radio"/> Disagree</p> <p>04 <input type="radio"/> Strongly disagree</p> |
| I frequently think of quitting this job.                                    | <p>SINGLE-SELECT <span style="float: right;">j2o</span></p> <p>01 <input type="radio"/> Strongly agree</p> <p>02 <input type="radio"/> Agree</p> <p>03 <input type="radio"/> Disagree</p> <p>04 <input type="radio"/> Strongly disagree</p> |
| My colleagues are supportive, that's why I like working here.               | <p>SINGLE-SELECT <span style="float: right;">j2p</span></p> <p>01 <input type="radio"/> Strongly agree</p> <p>02 <input type="radio"/> Agree</p> <p>03 <input type="radio"/> Disagree</p> <p>04 <input type="radio"/> Strongly disagree</p> |
| I work here because it provides long term security for me.                  | <p>SINGLE-SELECT <span style="float: right;">j2q</span></p> <p>01 <input type="radio"/> Strongly agree</p> <p>02 <input type="radio"/> Agree</p> <p>03 <input type="radio"/> Disagree</p> <p>04 <input type="radio"/> Strongly disagree</p> |
| I work here because of opportunities for promotion.                         | <p>SINGLE-SELECT <span style="float: right;">j2r</span></p> <p>01 <input type="radio"/> Strongly agree</p> <p>02 <input type="radio"/> Agree</p> <p>03 <input type="radio"/> Disagree</p> <p>04 <input type="radio"/> Strongly disagree</p> |
| I feel like I can accomplish something worthwhile in this job.              | <p>SINGLE-SELECT <span style="float: right;">j2s</span></p> <p>01 <input type="radio"/> Strongly agree</p> <p>02 <input type="radio"/> Agree</p> <p>03 <input type="radio"/> Disagree</p> <p>04 <input type="radio"/> Strongly disagree</p> |
| I work here because I enjoy doing this job.                                 | <p>SINGLE-SELECT <span style="float: right;">j2t</span></p> <p>01 <input type="radio"/> Strongly agree</p> <p>02 <input type="radio"/> Agree</p> <p>03 <input type="radio"/> Disagree</p> <p>04 <input type="radio"/> Strongly disagree</p> |
| It's difficult to care very much whether the work gets done right.          | <p>SINGLE-SELECT <span style="float: right;">j2u</span></p> <p>01 <input type="radio"/> Strongly agree</p> <p>02 <input type="radio"/> Agree</p> <p>03 <input type="radio"/> Disagree</p> <p>04 <input type="radio"/> Strongly disagree</p> |
| I sometimes feel that my work is meaningless.                               | <p>SINGLE-SELECT <span style="float: right;">j2v</span></p> <p>01 <input type="radio"/> Strongly agree</p> <p>02 <input type="radio"/> Agree</p> <p>03 <input type="radio"/> Disagree</p> <p>04 <input type="radio"/> Strongly disagree</p> |
| It is important for me to get recognition from the community for my work.   | <p>SINGLE-SELECT <span style="float: right;">j2w</span></p> <p>01 <input type="radio"/> Strongly agree</p> <p>02 <input type="radio"/> Agree</p>                                                                                            |

- 03  Disagree
- 04  Strongly disagree

## K CHARACTERISTICS OF THE RESPONDENT

|                                                                                                                    |                                                                                                                                                                                                                                                                                                                                                                                                                           |
|--------------------------------------------------------------------------------------------------------------------|---------------------------------------------------------------------------------------------------------------------------------------------------------------------------------------------------------------------------------------------------------------------------------------------------------------------------------------------------------------------------------------------------------------------------|
| <p>What is your gender?</p>                                                                                        | <p>SINGLE-SELECT <span style="float: right;">k1</span></p> <p>01 <input type="radio"/> Male</p> <p>02 <input type="radio"/> Female</p>                                                                                                                                                                                                                                                                                    |
| <p>What is your age?</p> <p>I Enter age in completed years</p> <p>V1 self.InRange(0,80)</p> <p>M1 Out of Range</p> | <p>NUMERIC: INTEGER <span style="float: right;">k2</span></p> <p>-----</p>                                                                                                                                                                                                                                                                                                                                                |
| <p>What is your marital status?</p>                                                                                | <p>SINGLE-SELECT <span style="float: right;">k3</span></p> <p>01 <input type="radio"/> Single</p> <p>02 <input type="radio"/> Engaged</p> <p>03 <input type="radio"/> In a living relation</p> <p>04 <input type="radio"/> Married</p> <p>05 <input type="radio"/> Widowed</p> <p>06 <input type="radio"/> Divorced</p> <p>07 <input type="radio"/> Separated</p>                                                         |
| <p>Is your spouse/ partner working or studying in the health sector?</p> <p>E k3.InList(2,3,4)</p>                 | <p>SINGLE-SELECT <span style="float: right;">k4</span></p> <p>01 <input type="radio"/> Yes</p> <p>02 <input type="radio"/> No</p>                                                                                                                                                                                                                                                                                         |
| <p>Where does your spouse/partner live?</p> <p>E k3.InList(2,3,4)</p>                                              | <p>SINGLE-SELECT <span style="float: right;">k5</span></p> <p>01 <input type="radio"/> Boké</p> <p>02 <input type="radio"/> Conakry</p> <p>03 <input type="radio"/> Faranah</p> <p>04 <input type="radio"/> Kankan</p> <p>05 <input type="radio"/> Kindia</p> <p>06 <input type="radio"/> Labé</p> <p>07 <input type="radio"/> Mamou</p> <p>08 <input type="radio"/> Nzérékoré</p> <p>09 <input type="radio"/> Abroad</p> |
| <p>Where?</p> <p>E k3 != 1 &amp;&amp; k5==9</p>                                                                    | <p>TEXT <span style="float: right;">k5oth</span></p> <p>-----</p>                                                                                                                                                                                                                                                                                                                                                         |
| <p>How many children do you have?</p> <p>I Write 0 if none.</p>                                                    | <p>NUMERIC: INTEGER <span style="float: right;">k6</span></p> <p>-----</p>                                                                                                                                                                                                                                                                                                                                                |
| <p>In which region were you born?</p>                                                                              | <p>SINGLE-SELECT <span style="float: right;">k7</span></p> <p>01 <input type="radio"/> Boké</p> <p>02 <input type="radio"/> Conakry</p> <p>03 <input type="radio"/> Faranah</p> <p>04 <input type="radio"/> Kankan</p> <p>05 <input type="radio"/> Kindia</p> <p>06 <input type="radio"/> Labé</p> <p>07 <input type="radio"/> Mamou</p> <p>08 <input type="radio"/> Nzérékoré</p> <p>09 <input type="radio"/> Abroad</p> |
| <p>Where?</p> <p>E k7==9</p>                                                                                       | <p>TEXT <span style="float: right;">k7oth</span></p> <p>-----</p>                                                                                                                                                                                                                                                                                                                                                         |

|                                                                              |                                                                                                                                                                                                                                                                                                                                                                                                                                                                                                                                                                                                                                                                                              |
|------------------------------------------------------------------------------|----------------------------------------------------------------------------------------------------------------------------------------------------------------------------------------------------------------------------------------------------------------------------------------------------------------------------------------------------------------------------------------------------------------------------------------------------------------------------------------------------------------------------------------------------------------------------------------------------------------------------------------------------------------------------------------------|
| <p>In which region did you grow up?</p>                                      | <p>SINGLE-SELECT <span style="float: right;">k8</span></p> <p>01 <input type="radio"/> Boké<br/> 02 <input type="radio"/> Conakry<br/> 03 <input type="radio"/> Faranah<br/> 04 <input type="radio"/> Kankan<br/> 05 <input type="radio"/> Kindia<br/> 06 <input type="radio"/> Labé<br/> 07 <input type="radio"/> Mamou<br/> 08 <input type="radio"/> Nzérékoré<br/> 09 <input type="radio"/> Abroad</p>                                                                                                                                                                                                                                                                                    |
| <p>Where?</p> <p>E k8==9</p>                                                 | <p>TEXT <span style="float: right;">k8oth</span></p> <p>.....</p>                                                                                                                                                                                                                                                                                                                                                                                                                                                                                                                                                                                                                            |
| <p>What was/is your father's highest level of education?</p>                 | <p>SINGLE-SELECT <span style="float: right;">k13</span></p> <p>01 <input type="radio"/> No education<br/> 03 <input type="radio"/> Completed primary education<br/> 04 <input type="radio"/> Completed secondary education<br/> 05 <input type="radio"/> Completed technical education or vocational training<br/> 06 <input type="radio"/> University education<br/> 99 <input type="radio"/> Don't Know<br/> 97 <input type="radio"/> Others, specify</p>                                                                                                                                                                                                                                  |
| <p>Specify other</p> <p>E k13==97</p>                                        | <p>TEXT <span style="float: right;">k13oth</span></p> <p>.....</p>                                                                                                                                                                                                                                                                                                                                                                                                                                                                                                                                                                                                                           |
| <p>What was/is your father's main field of occupation?</p>                   | <p>SINGLE-SELECT <span style="float: right;">k14</span></p> <p>01 <input type="radio"/> Work in the house<br/> 02 <input type="radio"/> Tailor/ dressmaker<br/> 03 <input type="radio"/> Trader / merchant<br/> 04 <input type="radio"/> Student / pupil<br/> 05 <input type="radio"/> Worker (bricklayer, mechanic, carpenter, electrician, painter)<br/> 06 <input type="radio"/> Farmer<br/> 07 <input type="radio"/> Driver<br/> 08 <input type="radio"/> Stockbreeder<br/> 09 <input type="radio"/> Sinner<br/> 10 <input type="radio"/> Employee / agronomist / engineer / teacher<br/> 11 <input type="radio"/> Health professional<br/> 97 <input type="radio"/> Others, specify</p> |
| <p>Specify other</p> <p>E k14==97</p>                                        | <p>TEXT <span style="float: right;">k14oth</span></p> <p>.....</p>                                                                                                                                                                                                                                                                                                                                                                                                                                                                                                                                                                                                                           |
| <p>Who owned the dwelling in which you grew up in?</p>                       | <p>SINGLE-SELECT <span style="float: right;">k15</span></p> <p>01 <input type="radio"/> Household<br/> 02 <input type="radio"/> Relations of head of household<br/> 03 <input type="radio"/> State<br/> 04 <input type="radio"/> Company or private enterprise<br/> 05 <input type="radio"/> Private landlord<br/> 97 <input type="radio"/> Others, specify</p>                                                                                                                                                                                                                                                                                                                              |
| <p>Specify other</p> <p>E k15==97</p>                                        | <p>TEXT <span style="float: right;">k15oth</span></p> <p>.....</p>                                                                                                                                                                                                                                                                                                                                                                                                                                                                                                                                                                                                                           |
| <p>How would you classify the socio-economic background of your parents?</p> | <p>SINGLE-SELECT <span style="float: right;">k12</span></p> <p>01 <input type="radio"/> Rich</p>                                                                                                                                                                                                                                                                                                                                                                                                                                                                                                                                                                                             |

- 02  Upper middle class
- 03  Lower middle class
- 04  Poor
- 05  Very poor

Would you classify the house that you grew up in as being in an urban area or a rural area?

- SINGLE-SELECT k16
- 01  Urban
  - 02  Rural

Approximately, how far away was the closest all weather road from the house you grew up in, in kilometres?

NUMERIC: INTEGER k17

-----

I Write in approximate kilometres

V1 self.InRange(0,300)

M1 Out of Range

Did the household you grew up in have any of the following items?

MULTI-SELECT: YES/NO k18

- 02  /  Refrigerator
- 03  /  Radio
- 04  /  Cassette/ CD Player
- 05  /  Television
- 06  /  Running Water
- 07  /  Electricity
- 08  /  Telephone
- 09  /  Car
- 10  /  Motorcycle
- 11  /  Bicycle
- 12  /  Own Land
- 13  /  Own House

Does your household own any of the following?

MULTI-SELECT: YES/NO k19

- 02  /  Refrigerator
- 03  /  Radio
- 04  /  Cassette/ CD Player
- 05  /  Television
- 06  /  Running Water
- 07  /  Electricity
- 08  /  Telephone
- 09  /  Car
- 10  /  Motorcycle
- 11  /  Bicycle
- 12  /  Own Land
- 13  /  Own House

How would you classify your household's socio-economic profile?

SINGLE-SELECT k12a

- 01  Rich
- 02  Upper middle class
- 03  Lower middle class
- 04  Poor
- 05  Very poor

Have you ever been to any other country in Africa?

SINGLE-SELECT k10

- 01  Yes
- 02  No

Have you ever been to any other country outside Africa?

SINGLE-SELECT k11

- 01  Yes
- 02  No

# L END OF INTERVIEW

|                              |                                                                                                                                                                              |
|------------------------------|------------------------------------------------------------------------------------------------------------------------------------------------------------------------------|
| Interview end time           | DATE: CURRENT TIME <span style="float: right;">11</span><br>.....                                                                                                            |
| Interview result             | SINGLE-SELECT <span style="float: right;">12</span><br>01 <input type="radio"/> Completed<br>02 <input type="radio"/> Incomplete<br>97 <input type="radio"/> Others, specify |
| Interview result<br>E 12==97 | TEXT <span style="float: right;">12_oth</span><br>.....                                                                                                                      |
| Interviewer's comments       | TEXT <span style="float: right;">13</span><br>.....                                                                                                                          |

# LEGEND

## Legend and structure of information in this file

| Name of section                                                                                                                                                                                                        | Enabling condition for this section                                                                                                                                                                                                                                                                                                                                                                                                                                                        | Type of question, scope                                                                                                                                                                                                                                                                                                                               | Variable name               |
|------------------------------------------------------------------------------------------------------------------------------------------------------------------------------------------------------------------------|--------------------------------------------------------------------------------------------------------------------------------------------------------------------------------------------------------------------------------------------------------------------------------------------------------------------------------------------------------------------------------------------------------------------------------------------------------------------------------------------|-------------------------------------------------------------------------------------------------------------------------------------------------------------------------------------------------------------------------------------------------------------------------------------------------------------------------------------------------------|-----------------------------|
| <p><b>SECTION 5: OTHER INCOME SOURCES</b></p> <p>E s4_other_sources_which.Contains(98)</p>                                                                                                                             | <p><b>Question title</b></p> <p><b>Duis aute irure dolor in reprehenderit in voluptate velit esse cillum dolore eu fugiat nulla pariatur?</b></p> <p>I This refers to family relations<br/>E s3_time_other &gt; 0<br/>V1 s4_re1_leaders_which.Contains(98)<br/>M1 Can not be itself<br/>V2 (s3_time_other_breeding_advice &lt;= (50 - s3_time_art_insem_advice))   s3_time_other_breeding_advice == 0<br/>M2 This person is not in the list<br/>F optioncode != s5_ignored_option_code</p> | <p><b>Answer options</b></p> <p>MULTI-SELECT<br/>SCOPE: PREFILLED</p> <p>01 <input type="checkbox"/> Community animal health workers<br/>02 <input type="checkbox"/> Private<br/>03 <input type="checkbox"/> Government<br/>04 <input type="checkbox"/> Livestock keepers association<br/>05 <input type="checkbox"/> NGO</p> <p>And 5 other [13]</p> | <p>s4_re1_leaders_other</p> |
| <p><b>Additional information:</b></p> <p>"I" – Question instruction<br/>"E" – Enabling condition<br/>"V1" – Validation condition №1<br/>"M1" – Message for validation №1<br/>"F" – Filter in Categorical questions</p> | <p><b>Link to full set in appendix</b></p>                                                                                                                                                                                                                                                                                                                                                                                                                                                 |                                                                                                                                                                                                                                                                                                                                                       |                             |

### Breadcrumbs

| Type or roster                        | Roster Title                                               |
|---------------------------------------|------------------------------------------------------------|
| CHAPTER 3 IDENTIFICATION /<br>Roster: | <b>LEADER RELATION DETAILS</b><br>generated by fixed list: |
| 01                                    | Ward Livestock Officer                                     |
| 02                                    | Village Livestock Officer                                  |
| 99                                    | Other (specify)                                            |

**List items**
