# Supplementary material for: How to attract and retain health workers in rural areas of a fragile state: Findings from a labour market survey in Guinea
Source: PubMed Central journal article supplement (PMC8675729; doi:10.1371/journal.pone.0245569), 2021-12-16
Supplement: pone.0245569.s002.pdf [file pone.0245569.s002.pdf]

# Professionnels de santé

---

## A ADMINISTRATION

No sub-sections, No rosters, Questions: 13, Variables: 1.

## B CONSENTEMENT

No sub-sections, No rosters, Questions: 6, Static texts: 1.

## C IDENTIFICATION

No sub-sections, No rosters, Questions: 3.

## D CHOIX DU TRAVAIL

No sub-sections, No rosters, Questions: 35, Static texts: 21.

## E TRAVAIL ACTUEL

Sub-sections: 5, No rosters, Questions: 36.

## F PRÉFÉRENCES

No sub-sections, No rosters, Questions: 10.

## G ANTÉCÉDENTS PROFESSIONNELS

No sub-sections, No rosters, Questions: 25, Static texts: 3.

## H REVENU ET DÉPENSES

Sub-sections: 5, No rosters, Questions: 46, Static texts: 1.

## I ABSENTÉISME

No sub-sections, No rosters, Questions: 10.

## J SATISFACTION ET CONTRAINTES

Sub-sections: 2, No rosters, Questions: 28.

## K DESCRIPTION DE LA PERSONNE INTERROGÉE

No sub-sections, No rosters, Questions: 25.

## L FIN DE L'ENTRETIEN

No sub-sections, No rosters, Questions: 4.

## LEGEND

## A ADMINISTRATION

|                                              |                                                                                                                                                                                                                                                                                                                                                              |
|----------------------------------------------|--------------------------------------------------------------------------------------------------------------------------------------------------------------------------------------------------------------------------------------------------------------------------------------------------------------------------------------------------------------|
| Code ID de l'établissement                   | TEXT<br>SCOPE: IDENTIFYING<br>hfid                                                                                                                                                                                                                                                                                                                           |
| Code ID de la personne réalisant l'entretien | TEXT<br>a1                                                                                                                                                                                                                                                                                                                                                   |
| Code ID du (de la) responsable               | TEXT<br>a2                                                                                                                                                                                                                                                                                                                                                   |
| Date de l'entretien                          | DATE: CURRENT TIME<br>a3                                                                                                                                                                                                                                                                                                                                     |
| Nom de l'établissement                       | TEXT<br>a4                                                                                                                                                                                                                                                                                                                                                   |
| Type d'établissement de santé                | SINGLE-SELECT<br>a5<br>01 <input type="radio"/> Hôpital national<br>02 <input type="radio"/> Hôpital régional<br>03 <input type="radio"/> Hôpital préfectoral<br>04 <input type="radio"/> Centre médico-communal<br>05 <input type="radio"/> Centre de santé amélioré<br>06 <input type="radio"/> Centre de santé<br>07 <input type="radio"/> Poste de santé |
| Lieu                                         | SINGLE-SELECT<br>a6<br>01 <input type="radio"/> Urbain<br>02 <input type="radio"/> Rural                                                                                                                                                                                                                                                                     |
| Zone                                         | SINGLE-SELECT<br>a7<br>01 <input type="radio"/> Zone 1<br>02 <input type="radio"/> Zone 2<br>03 <input type="radio"/> Zone 3<br>04 <input type="radio"/> Zone 4<br>98 <input type="radio"/> Je ne sais pas                                                                                                                                                   |
| Région                                       | SINGLE-SELECT<br>a8<br>01 <input type="radio"/> Boké<br>02 <input type="radio"/> Conakry<br>03 <input type="radio"/> Faranah<br>04 <input type="radio"/> Kankan<br>05 <input type="radio"/> Kindia<br>06 <input type="radio"/> Labé<br>07 <input type="radio"/> Mamou<br>08 <input type="radio"/> Nzérékoré                                                  |
| Préfecture                                   | TEXT<br>a9                                                                                                                                                                                                                                                                                                                                                   |
| Sous-Préfecture                              | TEXT<br>a10                                                                                                                                                                                                                                                                                                                                                  |
| Ville la plus proche                         | TEXT<br>a11                                                                                                                                                                                                                                                                                                                                                  |

|                            |        |       |
|----------------------------|--------|-------|
| Coordonnées GPS            | GPS    | a12   |
|                            | N      | ----- |
|                            | W      | ----- |
|                            | A      | ----- |
| VARIABLE<br>Quest. IRnd () | DOUBLE | rnd   |

## B CONSENTEMENT

STATIC TEXT

Bonjour. Je m'appelle \_\_\_\_\_ et je viens de CERREGUI. Nous travaillons avec le Ministère de la santé, la Banque mondiale et Oxford Policy Management sur ce projet d'analyse de la santé. Nous aimerions savoir comment vous êtes devenu un professionnel de santé, à quels défis vous devez faire face dans votre travail quotidien, quelles sont vos motivations et vos préférences. Vos réponses nous aideront à mieux comprendre votre situation en tant qu'agent de santé. Nous présenterons les résultats au Ministère de la santé pour permettre aux acteurs politiques de concevoir des améliorations dans les conditions de travail pour les professionnels de santé en Guinée. L'entretien durera environ 60 minutes. La participation à cette étude est entièrement volontaire. Les conclusions seront rapportées de telle sorte que personne ne saura ce que vous me direz aujourd'hui. Les résultats seront groupés, sans afficher de détails sur les participants. Cela signifie que vous pouvez être totalement honnête avec nous. Bien entendu, vous pouvez refuser de répondre à toute question et arrêter l'entretien à tout moment si vous le souhaitez. Avez-vous déjà des questions au sujet de l'étude ? Ai-je votre accord pour continuer dans cette voie ?

Je comprends que les renseignements que je fournirai pour les biens de l'enquête incluent des identificateurs qui permettront de me contacter pour d'éventuels éclaircissements. Je comprends que les informations relatives à l'identificateur ne seront pas utilisées dans l'analyse. Chaque formulaire sera rendu anonyme et aucune information personnelle ne sera partagée avec quiconque autre que l'équipe de recherche.

SINGLE-SELECT

b1

- 01  Oui  
02  Non

V1 self==1

M1 EXPLIQUER AU RÉPONDANT DE FAÇON SIMPLE

Je comprends que ma participation est volontaire et que je suis libre de me retirer à tout moment, sans en donner la raison, et sans que mon emploi, ou mes droits juridiques soient affectés.

SINGLE-SELECT

b2

- 01  Oui  
02  Non

V1 self==1

M1 EXPLIQUER AU RÉPONDANT DE FAÇON SIMPLE

Je comprends que les informations de mon entretien seront mises en commun avec les réponses d'autres participants, et qu'elles seront rendues anonymes et qu'elles peuvent être publiées.

SINGLE-SELECT

b3

- 01  Oui  
02  Non

V1 self==1

M1 EXPLIQUER AU RÉPONDANT DE FAÇON SIMPLE

Souhaitez-vous participer à notre enquête ?

SINGLE-SELECT

b4

- 01  Oui  
02  Non

E b1==1 && b2==1 && b3==1

Si vous ne souhaitez pas participer à cette étude, pourriez-vous nous indiquer votre raison principale ?

SINGLE-SELECT

b5

- 01  Je n'ai pas le temps

E b4==2

- 02  Ça ne m'intéresse pas
- 03  Les supérieurs ne l'acceptent pas
- 04  Il s'agit de renseignements personnels
- 05  Peur/ anxiété
- 97  Autre, précisez
- 98  Je ne sais pas

Précisez autre

TEXT

b5 oth

E b5==97

.....

## C IDENTIFICATION

Nom et prénom de la personne

TEXT

c1

.....

Quelle est votre profession ?

SINGLE-SELECT

c2

- 01  Médecin spécialiste
- 02  Médecin
- 03  Infirmier (ère)
- 04  Sage-femme
- 05  ATS

Numéro de téléphone portable

TEXT

c3

I Écrire 000000000 s'il n'y en a pas

.....

## D CHOIX DU TRAVAIL

STATIC TEXT

*À lire par la personne réalisant l'entretien : Dans cette partie du questionnaire, nous voulons essayer de comprendre les facteurs qui agissent sur les préférences professionnelles des médecins. Il y a de nombreuses caractéristiques importantes pour un emploi, mais nous avons choisi de nous concentrer sur sept d'entre elles : le lieu, le type d'établissement, le matériel de l'établissement, le logement, le transport, le revenu et la formation. Nous vous présenterons 16 séries de description de postes de travail hypothétiques. Dans chaque série, les postes sont appelés « Poste A » et « Poste B ». Les caractéristiques du « Poste A » et du « Poste B » varient selon les séries. Chaque emploi présente des avantages et des inconvénients et vous devrez évaluer ces avantages et inconvénients et faire un compromis en choisissant quel emploi vous préférez.*

STATIC TEXT

**A MONTRER:**

- (1) la feuille avec les différentes caractéristiques en rapport avec le type de travailleur: %c2%
- (2) L'exemple pour le travailleur %c2%

STATIC TEXT

E (c2==1 || c2 == 2) && rnd<0.5

*Procédure alternative: Veuillez passer la tablette à l'enquêté(e) et faire exemple avec lui/elle*

| Médecins: EXEMPLE   |                |                       |
|---------------------|----------------|-----------------------|
| Caractéristiques    | Poste A        | Poste B               |
| Salaire             | 6.5 millions   | 2 millions            |
| Localisation        | Conakry        | capitale préfectorale |
| Equipement          | Bon            | Mediocre              |
| Formation           | spécialisation | aucun                 |
| Temps d'affectation | indéterminée   | indéterminée          |
| Logement            | logement       | aucun                 |
| Transport           | moto           | aucun                 |

Exemple: faites le choix

E (c2==1 || c2 == 2) && rnd<0.5

SINGLE-SELECT

choice ex

- 01  Job A  
02  Job B

STATIC TEXT

E rnd>=0.5 || c2==3 || c2 == 4 || c2 == 5

*Procédure standard: Veuillez montrer et lire les cartes a la personne enquêtée*

Mettre l'heure de depart

DATE: CURRENT TIME

DCE start time

.....

STATIC TEXT

E (c2==1 || c2 == 2) && rnd<0.5

*Choix Numéro 1*

| Caractéristiques    | Poste A               | Poste B      |
|---------------------|-----------------------|--------------|
| Salaire             | 6.5 millions          | 6.5 millions |
| Localisation        | capitale préfectorale | Conakry      |
| Equipement          | Médiocre              | bon          |
| Formation           | spécialisation        | ateliers     |
| Temps d'affectation | indéterminée          | indéterminée |
| Logement            | aucun                 | aucun        |
| Transport           | moto                  | aucun        |

Choix numéro 1

SINGLE-SELECT

choice1

- 01  Job A  
02  Job B

Si vous pouviez avoir ce poste, l'accepteriez-vous?

SINGLE-SELECT

choice1\_would

- 01  oui  
02  non

STATIC TEXT

E (c2==1 || c2 == 2) && rnd<0.5

*Choix Numéro 2*

| Caractéristiques    | Poste A               | Poste B                         |
|---------------------|-----------------------|---------------------------------|
| Salaire             | 3.5 millions          | 2 millions                      |
| Localisation        | capitale préfectorale | capitale sous-préfectorale (CS) |
| Equipement          | moyen                 | médiocre                        |
| Formation           | ateliers              | ateliers                        |
| Temps d'affectation | indéterminée          | 5 ans                           |
| Logement            | aucun                 | logement                        |
| Transport           | moto                  | aucun                           |

Choix numéro 2

SINGLE-SELECT

choice2

- 01  Job A  
02  Job B

Si vous pouviez avoir ce poste, l'accepteriez-vous?

SINGLE-SELECT

choice2 would

- 01  oui  
02  non

STATIC TEXT

E (c2==1 || c2 == 2) && rnd<0.5

### Choix Numéro 3

| Caractéristiques    | Poste A        | Poste B               |
|---------------------|----------------|-----------------------|
| Salaire             | 2 millions     | 3.5 millions          |
| Localisation        | Conakry        | capitale préfectorale |
| Equipement          | moyen          | moyen                 |
| Formation           | spécialisation | ateliers              |
| Temps d'affectation | indéterminée   | indéterminée          |
| Logement            | aucun          | logement              |
| Transport           | aucun          | moto                  |

Choix numéro 3

SINGLE-SELECT

choice3

- 01  Job A  
02  Job B

Si vous pouviez avoir ce poste, l'accepteriez-vous?

SINGLE-SELECT

choice3 would

- 01  oui  
02  non

STATIC TEXT

E (c2==1 || c2 == 2) && rnd<0.5

### Choix Numéro 4

| Caractéristiques    | Poste A               | Poste B                         |
|---------------------|-----------------------|---------------------------------|
| Salaire             | 2 millions            | 6.5 millions                    |
| Localisation        | capitale préfectorale | capitale sous-préfectorale (CS) |
| Equipement          | bon                   | moyen                           |
| Formation           | aucun                 | aucun                           |
| Temps d'affectation | indéterminée          | 5 ans                           |
| Logement            | logement              | aucun                           |
| Transport           | aucun                 | moto                            |

Choix numéro 4

SINGLE-SELECT

choice4

- 01  Job A  
02  Job B

Si vous pouviez avoir ce poste, l'accepteriez-vous?

SINGLE-SELECT

choice4 would

- 01  oui  
02  non

STATIC TEXT

E (c2==1 || c2 == 2) && rnd<0.5

### Choix Numéro 5

| Caractéristiques    | Poste A      | Poste B                         |
|---------------------|--------------|---------------------------------|
| Salaire             | 3.5 millions | 2 millions                      |
| Localisation        | Conakry      | capitale sous-préfectorale (CS) |
| Equipement          | médiocre     | médiocre                        |
| Formation           | aucun        | ateliers                        |
| Temps d'affectation | indéterminée | indéterminée                    |
| Logement            | aucun        | aucun                           |
| Transport           | aucun        | moto                            |

Choix numéro 5

SINGLE-SELECT

choice5

- 01  Job A
- 02  Job B

Si vous pouviez avoir ce poste, l'accepteriez-vous?

SINGLE-SELECT

choice5\_would

- 01  oui
- 02  non

STATIC TEXT

E (c2==1 || c2 == 2) && rnd<0.5

### Choix Numéro 6

| Caractéristiques    | Poste A        | Poste B               |
|---------------------|----------------|-----------------------|
| Salaire             | 2 millions     | 2 millions            |
| Localisation        | Conakry        | capitale préfectorale |
| Equipement          | moyen          | bon                   |
| Formation           | spécialisation | aucun                 |
| Temps d'affectation | indéterminée   | indéterminée          |
| Logement            | aucun          | aucun                 |
| Transport           | aucun          | moto                  |

Choix numéro 6

SINGLE-SELECT

choice6

- 01  Job A
- 02  Job B

Si vous pouviez avoir ce poste, l'accepteriez-vous?

SINGLE-SELECT

choice6\_would

- 01  oui
- 02  non

STATIC TEXT

E (c2==1 || c2 == 2) && rnd<0.5

### Choix Numéro 7

| Caractéristiques    | Poste A               | Poste B                         |
|---------------------|-----------------------|---------------------------------|
| Salaire             | 3.5 millions          | 3.5 millions                    |
| Localisation        | capitale préfectorale | capitale sous-préfectorale (CS) |
| Equipement          | moyen                 | bon                             |
| Formation           | ateliers              | spécialisation                  |
| Temps d'affectation | indéterminée          | indéterminée                    |
| Logement            | aucun                 | logement                        |
| Transport           | moto                  | aucun                           |

Choix numéro 7

SINGLE-SELECT

choice7

- 01  Job A
- 02  Job B

Si vous pouviez avoir ce poste, l'accepteriez-vous?

SINGLE-SELECT

choice7\_would

- 01  oui
- 02  non

STATIC TEXT

E (c2==1 || c2 == 2) && rnd<0.5

### Choix Numéro 8

| Caractéristiques    | Poste A                         | Poste B               |
|---------------------|---------------------------------|-----------------------|
| Salaire             | 3.5 millions                    | 2 millions            |
| Localisation        | capitale sous-préfectorale (CS) | capitale préfectorale |
| Equipement          | bon                             | bon                   |
| Formation           | spécialisation                  | aucun                 |
| Temps d'affectation | indéterminée                    | 5 ans                 |
| Logement            | aucun                           | logement              |
| Transport           | aucun                           | moto                  |

Choix numéro 8

SINGLE-SELECT

choice8

- 01  Job A  
02  Job B

Si vous pouviez avoir ce poste, l'accepteriez-vous?

SINGLE-SELECT

choice8\_would

- 01  oui  
02  non

STATIC TEXT

E (c2==1 || c2 == 2) && rnd<0.5

Choix Numéro 9

| Caractéristiques    | Poste A                         | Poste B        |
|---------------------|---------------------------------|----------------|
| Salaire             | 6.5 millions                    | 2 millions     |
| Localisation        | capitale sous-préfectorale (CS) | Conakry        |
| Equipement          | moyen                           | moyen          |
| Formation           | aucun                           | spécialisation |
| Temps d'affectation | 5 ans                           | indéterminée   |
| Logement            | aucun                           | aucun          |
| Transport           | aucun                           | aucun          |

Choix numéro 9

SINGLE-SELECT

choice9

- 01  Job A  
02  Job B

Si vous pouviez avoir ce poste, l'accepteriez-vous?

SINGLE-SELECT

choice9\_would

- 01  oui  
02  non

STATIC TEXT

E (c2==1 || c2 == 2) && rnd<0.5

Choix Numéro 10

| Caractéristiques    | Poste A      | Poste B               |
|---------------------|--------------|-----------------------|
| Salaire             | 6.5 millions | 3.5 millions          |
| Localisation        | Conakry      | capitale préfectorale |
| Equipement          | bon          | moyen                 |
| Formation           | ateliers     | ateliers              |
| Temps d'affectation | indéterminée | 5 ans                 |
| Logement            | aucun        | logement              |
| Transport           | aucun        | aucun                 |

Choix numéro 10

SINGLE-SELECT

choice10

- 01  Job A  
02  Job B

Si vous pouviez avoir ce poste, l'accepteriez-vous?

SINGLE-SELECT

choice10\_would

- 01  oui  
02  non

STATIC TEXT



E (c2==1 || c2 == 2) && rnd<0.5

### Choix Numéro 11

| Caractéristiques    | Poste A                         | Poste B      |
|---------------------|---------------------------------|--------------|
| Salaire             | 3.5 millions                    | 3.5 millions |
| Localisation        | capitale sous-préfecturale (CS) | Conakry      |
| Equipement          | bon                             | médiocre     |
| Formation           | spécialisation                  | aucun        |
| Temps d'affectation | indéterminée                    | indéterminée |
| Logement            | aucun                           | aucun        |
| Transport           | aucun                           | aucun        |

Choix numéro 11

SINGLE-SELECT

choice11

- 01  Job A  
02  Job B

Si vous pouviez avoir ce poste, l'accepteriez-vous?

SINGLE-SELECT

choice11 would

- 01  oui  
02  non

STATIC TEXT

E (c2==1 || c2 == 2) && rnd<0.5

### Choix Numéro 12

| Caractéristiques    | Poste A      | Poste B                         |
|---------------------|--------------|---------------------------------|
| Salaire             | 3.5 millions | 6.5 millions                    |
| Localisation        | Conakry      | capitale sous-préfecturale (CS) |
| Equipement          | médiocre     | moyen                           |
| Formation           | aucun        | aucun                           |
| Temps d'affectation | indéterminée | 5 ans                           |
| Logement            | aucun        | logement                        |
| Transport           | aucun        | aucun                           |

Choix numéro 12

SINGLE-SELECT

choice12

- 01  Job A  
02  Job B

Si vous pouviez avoir ce poste, l'accepteriez-vous?

SINGLE-SELECT

choice12 would

- 01  oui  
02  non

STATIC TEXT

E (c2==1 || c2 == 2) && rnd<0.5

### Choix Numéro 13

| Caractéristiques    | Poste A                         | Poste B               |
|---------------------|---------------------------------|-----------------------|
| Salaire             | 2 millions                      | 2 millions            |
| Localisation        | capitale sous-préfecturale (CS) | capitale préfectorale |
| Equipement          | médiocre                        | bon                   |
| Formation           | ateliers                        | aucun                 |
| Temps d'affectation | indéterminée                    | 5 ans                 |
| Logement            | logement                        | aucun                 |
| Transport           | moto                            | aucun                 |

Choix numéro 13

SINGLE-SELECT

choice13

- 01  Job A  
02  Job B

Si vous pouviez avoir ce poste, l'accepteriez-vous?

SINGLE-SELECT

choice13 would

- 01  oui

STATIC TEXT

E (c2==1 || c2 == 2) &amp;&amp; rnd&lt;0.5

**Choix Numéro 14**

| Caractéristiques    | Poste A                         | Poste B               |
|---------------------|---------------------------------|-----------------------|
| Salaire             | 6.5 millions                    | 3.5 millions          |
| Localisation        | capitale sous-préfecturale (CS) | capitale préfectorale |
| Equipement          | moyen                           | moyen                 |
| Formation           | aucun                           | ateliers              |
| Temps d'affectation | indéterminée                    | 5 ans                 |
| Logement            | logement                        | aucun                 |
| Transport           | moto                            | aucun                 |

Choix numéro 14

SINGLE-SELECT

choice14

- 01  Job A  
02  Job B

Si vous pouviez avoir ce poste, l'accepteriez-vous?

SINGLE-SELECT

choice14\_would

- 01  oui  
02  non

STATIC TEXT

E (c2==1 || c2 == 2) &amp;&amp; rnd&lt;0.5

**Choix Numéro 15**

| Caractéristiques    | Poste A               | Poste B                         |
|---------------------|-----------------------|---------------------------------|
| Salaire             | 6.5 millions          | 6.5 millions                    |
| Localisation        | capitale préfectorale | capitale sous-préfecturale (CS) |
| Equipement          | médiocre              | moyen                           |
| Formation           | spécialisation        | aucun                           |
| Temps d'affectation | 5 ans                 | indéterminée                    |
| Logement            | aucun                 | logement                        |
| Transport           | moto                  | aucun                           |

Choix numéro 15

SINGLE-SELECT

choice15

- 01  Job A  
02  Job B

Si vous pouviez avoir ce poste, l'accepteriez-vous?

SINGLE-SELECT

choice15\_would

- 01  oui  
02  non

STATIC TEXT

E (c2==1 || c2 == 2) &amp;&amp; rnd&lt;0.5

**Choix Numéro 16**

| Caractéristiques    | Poste A               | Poste B                         |
|---------------------|-----------------------|---------------------------------|
| Salaire             | 6.5 millions          | 3.5 millions                    |
| Localisation        | capitale préfectorale | capitale sous-préfecturale (CS) |
| Equipement          | médiocre              | bon                             |
| Formation           | spécialisation        | spécialisation                  |
| Temps d'affectation | indéterminée          | 5 ans                           |
| Logement            | logement              | aucun                           |
| Transport           | aucun                 | moto                            |

Choix numéro 16

SINGLE-SELECT

choice16

- 01  Job A  
02  Job B

|                                                     |                                                                               |                |
|-----------------------------------------------------|-------------------------------------------------------------------------------|----------------|
| Si vous pouviez avoir ce poste, l'accepteriez-vous? | SINGLE-SELECT<br>01 <input type="radio"/> oui<br>02 <input type="radio"/> non | choice16 would |
|-----------------------------------------------------|-------------------------------------------------------------------------------|----------------|

STATIC TEXT

E (c2==1 || c2 == 2) && rnd<0.5

Merci ! Veuillez rendre la tablette a l'enquêteur

|                       |                             |              |
|-----------------------|-----------------------------|--------------|
| Mettre l'heure de fin | DATE: CURRENT TIME<br>..... | DCE_end_time |
|-----------------------|-----------------------------|--------------|

## E TRAVAIL ACTUEL

### E TRAVAIL ACTUEL POSTE ACTUEL

|                                                                                                                                                                                                                                                                                                                                                         |                                                                                                                                                                                                                                                                                                                          |
|---------------------------------------------------------------------------------------------------------------------------------------------------------------------------------------------------------------------------------------------------------------------------------------------------------------------------------------------------------|--------------------------------------------------------------------------------------------------------------------------------------------------------------------------------------------------------------------------------------------------------------------------------------------------------------------------|
| <p>Depuis combien d'années travaillez-vous à votre poste actuel ? (dans cet établissement de santé)</p> <p>I Écrire en années complètes. Si c'est moins d'un an, écrire '0'</p> <p>V1 self.InRange(0,70)</p> <p>M1 Il devrait être entre 0 à 70. S.v.p. confirmer et entrer à nouveau.</p>                                                              | <p>NUMERIC: INTEGER e4</p> <p>-----</p>                                                                                                                                                                                                                                                                                  |
| <p>Avez-vous choisi de travailler dans cet établissement ?</p>                                                                                                                                                                                                                                                                                          | <p>SINGLE-SELECT e5</p> <p>01 <input type="radio"/> Oui</p> <p>02 <input type="radio"/> Non</p>                                                                                                                                                                                                                          |
| <p>Depuis combien d'années travaillez-vous dans cet établissement ?</p> <p>I Écrire en années complètes. Si c'est moins d'un an, écrire '0'</p> <p>V1 self.InRange(0,70)</p> <p>M1 Il devrait être entre 0 à 70. S.v.p. confirmer et entrer à nouveau.</p> <p>V2 self&gt;=e4</p> <p>M2 Ne put pas être inférieur au nombre d'années au poste actuel</p> | <p>NUMERIC: INTEGER e1</p> <p>-----</p>                                                                                                                                                                                                                                                                                  |
| <p>Dans combien de postes différents avez-vous travaillé dans cet établissement de santé?</p> <p>I Écrire le nombre de postes, écrire '1' si ce n'est qu'un seul poste</p> <p>V1 self.InRange(1,20)</p>                                                                                                                                                 | <p>NUMERIC: INTEGER e1_1</p> <p>-----</p>                                                                                                                                                                                                                                                                                |
| <p>Avez-vous un poste permanent ou contractuel ?</p> <p>I NE SUGGÉREZ PAS DE RÉPONSE</p>                                                                                                                                                                                                                                                                | <p>SINGLE-SELECT e2</p> <p>01 <input type="radio"/> Fonction publique (titulaire)</p> <p>02 <input type="radio"/> Contractuel payé par communauté</p> <p>03 <input type="radio"/> Contractuel payé par l'établissement de santé</p> <p>04 <input type="radio"/> Contractuel payé par les institutions de coopération</p> |
| <p>Quel est votre fonction ?</p>                                                                                                                                                                                                                                                                                                                        | <p>SINGLE-SELECT e3</p> <p>01 <input type="radio"/> Gestionnaire</p> <p>02 <input type="radio"/> Fonction médicale</p> <p>03 <input type="radio"/> Fonction soignant</p> <p>04 <input type="radio"/> Plusieurs</p> <p>97 <input type="radio"/> Autre, précisez</p>                                                       |
| <p>Specify other</p>                                                                                                                                                                                                                                                                                                                                    | <p>TEXT e3_oth</p>                                                                                                                                                                                                                                                                                                       |

|                                                                                                                                                                              |                                                                                                                                                                                                                                                                                                                                                                                                                                                     |
|------------------------------------------------------------------------------------------------------------------------------------------------------------------------------|-----------------------------------------------------------------------------------------------------------------------------------------------------------------------------------------------------------------------------------------------------------------------------------------------------------------------------------------------------------------------------------------------------------------------------------------------------|
| E e3==97                                                                                                                                                                     | .....                                                                                                                                                                                                                                                                                                                                                                                                                                               |
| Avez-vous reçu(e) votre formation de base dans cette région ?                                                                                                                | SINGLE-SELECT e6<br>01 <input type="radio"/> Oui<br>02 <input type="radio"/> Non                                                                                                                                                                                                                                                                                                                                                                    |
| Où avez-vous reçu(e) votre formation de base ?<br>E e6==2                                                                                                                    | SINGLE-SELECT e7<br>01 <input type="radio"/> Boké<br>02 <input type="radio"/> Conakry<br>03 <input type="radio"/> Faranah<br>04 <input type="radio"/> Kankan<br>05 <input type="radio"/> Kindia<br>06 <input type="radio"/> Labé<br>07 <input type="radio"/> Mamou<br>08 <input type="radio"/> Nzérékoré                                                                                                                                            |
| Avez-vous travaillé en milieu rural durant votre formation de base ?                                                                                                         | SINGLE-SELECT g6<br>01 <input type="radio"/> Oui<br>02 <input type="radio"/> Non                                                                                                                                                                                                                                                                                                                                                                    |
| Effectuez-vous des tâches pour lesquelles vous n'avez pas été préparé(e) au cours de vos formations de base et complémentaire ?<br>I NE SUGGÉREZ PAS DE RÉPONSE              | SINGLE-SELECT e8<br>01 <input type="radio"/> Oui, chaque jour<br>02 <input type="radio"/> Souvent<br>03 <input type="radio"/> Rarement<br>04 <input type="radio"/> Jamais<br>99 <input type="radio"/> Je préfère ne pas le dire                                                                                                                                                                                                                     |
| Quelles tâches pour lesquelles vous n'avez pas reçu de formation effectuez-vous en ce moment ?<br>I Plusieurs choix possibles NE PAS SUGGÉRER DE RÉPONSE<br>E e8==1    e8==2 | MULTI-SELECT e9<br>01 <input type="checkbox"/> Consultation externe<br>02 <input type="checkbox"/> Accident et urgence<br>03 <input type="checkbox"/> Opération mineure<br>04 <input type="checkbox"/> Vaccination<br>05 <input type="checkbox"/> Services de santé maternelle/conseil<br>06 <input type="checkbox"/> Services de planning familial/conseil<br>07 <input type="checkbox"/> Pharmacie<br>97 <input type="checkbox"/> Autre, précisez |
| Précisez autre<br>E e9.Contains (97)                                                                                                                                         | TEXT e9_oth<br>.....                                                                                                                                                                                                                                                                                                                                                                                                                                |
| En somme, vous sentez-vous assez bien préparé(e) et formé(e) pour votre poste actuel ?<br>I NE SUGGÉREZ PAS DE RÉPONSE                                                       | SINGLE-SELECT e10<br>01 <input type="radio"/> Oui<br>02 <input type="radio"/> Parfois je me sens surchargé(e)<br>03 <input type="radio"/> Non, pas du tout                                                                                                                                                                                                                                                                                          |

E TRAVAIL ACTUEL  
ACTIVITÉS ET RESPONSABILITÉS

|                                                 |                                                                                                                                                                            |
|-------------------------------------------------|----------------------------------------------------------------------------------------------------------------------------------------------------------------------------|
| Consultez-vous des patient(e)s tous les jours ? | SINGLE-SELECT e11<br>01 <input type="radio"/> Oui, chaque jour<br>02 <input type="radio"/> Souvent<br>03 <input type="radio"/> Rarement<br>04 <input type="radio"/> Jamais |
| Pourquoi pas ?<br>E e11==4                      | SINGLE-SELECT e12<br>01 <input type="radio"/> Pas assez de patients<br>02 <input type="radio"/> J'effectue d'autres tâches<br>97 <input type="radio"/> Autre, précisez     |

|                                                                                                          |                                                               |        |
|----------------------------------------------------------------------------------------------------------|---------------------------------------------------------------|--------|
| Précisez autre                                                                                           | TEXT                                                          | e12oth |
| E e12==97                                                                                                | .....                                                         |        |
| En moyenne, combien de patient(e)s consultez-vous chaque jour lorsque vous êtes dans cet établissement ? | NUMERIC: INTEGER                                              | e13    |
| E e11==1    e11==2    e11==3                                                                             | -----                                                         |        |
| V1 self.InRange(1,80)                                                                                    |                                                               |        |
| M1 Nombre non-valide                                                                                     |                                                               |        |
| Que pensez-vous du nombre de patient(e)s que vous voyez tous les jours ?                                 | SINGLE-SELECT                                                 | e14    |
| I SUGGÉRER DE RÉPONSE                                                                                    | 01 <input type="radio"/> C'est plus que je ne peux gérer      |        |
| E e11==1    e11==2    e11==3                                                                             | 02 <input type="radio"/> Acceptable                           |        |
|                                                                                                          | 03 <input type="radio"/> Je pourrais en gérer un peu plus     |        |
|                                                                                                          | 04 <input type="radio"/> Je pourrais en gérer beaucoup plus   |        |
| Répondez-vous à tous les attentes médicales des patient(e)s que vous consultez ?                         | SINGLE-SELECT                                                 | e15    |
| E e11==1    e11==2                                                                                       | 01 <input type="radio"/> Oui                                  |        |
|                                                                                                          | 02 <input type="radio"/> Non                                  |        |
| Pourquoi pas?                                                                                            | SINGLE-SELECT                                                 | e16    |
| I NE SUGGÉREZ PAS DE RÉPONSE                                                                             | 01 <input type="radio"/> Nous n'offrons qu'un service limités |        |
| E (e11==1    e11==2    e11==3) && e15==2                                                                 | 02 <input type="radio"/> Manque de matériel                   |        |
|                                                                                                          | 03 <input type="radio"/> Matériel non fonctionnel             |        |
|                                                                                                          | 04 <input type="radio"/> Manque de formation/compétences      |        |
|                                                                                                          | 05 <input type="radio"/> Manque de personnel                  |        |
|                                                                                                          | 97 <input type="radio"/> Autre, précisez                      |        |
| Précisez autre                                                                                           | TEXT                                                          | e16oth |
| E (e11==1    e11==2    e11==3) && e16==97                                                                | .....                                                         |        |

E TRAVAIL ACTUEL  
CHARGE DE TRAVAIL

|                                                                                                         |                                |     |
|---------------------------------------------------------------------------------------------------------|--------------------------------|-----|
| Au cours d'une semaine normale, combien de jours travaillez-vous dans cet établissement ?               | NUMERIC: INTEGER               | e17 |
| I Écrivez le nombre de jours par semaine. Écrivez "0" si vous ne travaillez pas dans cet établissement. | -----                          |     |
| V1 self.InRange(0,7)                                                                                    |                                |     |
| M1 Nombre non-valide                                                                                    |                                |     |
| Avez-vous l'impression que vos collègues (même cadre) travaillent environ le même nombre de jours ?     | SINGLE-SELECT                  | e18 |
|                                                                                                         | 01 <input type="radio"/> Plus  |     |
|                                                                                                         | 02 <input type="radio"/> Même  |     |
|                                                                                                         | 03 <input type="radio"/> Moins |     |
|                                                                                                         | 04 <input type="radio"/> NA    |     |
| Au cours d'une journée normale, combien d'heures travaillez-vous dans cet établissement ?               | NUMERIC: INTEGER               | e19 |
| I Écrivez le nombre d'heures par jour.                                                                  | -----                          |     |
| V1 self.InRange(0,24)                                                                                   |                                |     |
| M1 Nombre non-valide                                                                                    |                                |     |
| Avez-vous l'impression que vos collègues (même cadre) travaillent environ le même                       | SINGLE-SELECT                  | e20 |
|                                                                                                         | 01 <input type="radio"/> Plus  |     |

|                                                                                            |                                                                                                                                                                                                    |
|--------------------------------------------------------------------------------------------|----------------------------------------------------------------------------------------------------------------------------------------------------------------------------------------------------|
| nombre d'heures dans une journée ?                                                         | 02 <input type="radio"/> Même<br>03 <input type="radio"/> Moins<br>99 <input type="radio"/> NA                                                                                                     |
| Pensez-vous que votre emploi du temps vous permet d'accomplir aisément toutes vos tâches ? | SINGLE-SELECT e21<br>01 <input type="radio"/> Oui<br>02 <input type="radio"/> Parfois, il n'y a pas assez de temps<br>03 <input type="radio"/> Non, j'arrive à peine à effectuer toutes mes tâches |

E TRAVAIL ACTUEL  
GESTION ET CONTRÔLE

|                                                                                                                              |                                                                                                                                                                                                                                                                                                                                                                                                                                                                                                                                                                                                                                          |
|------------------------------------------------------------------------------------------------------------------------------|------------------------------------------------------------------------------------------------------------------------------------------------------------------------------------------------------------------------------------------------------------------------------------------------------------------------------------------------------------------------------------------------------------------------------------------------------------------------------------------------------------------------------------------------------------------------------------------------------------------------------------------|
| Existe-il une hiérarchie stricte dans votre établissement ?<br>I Donnez des exemples de direction stricte ou plus tolérante. | SINGLE-SELECT e22<br>01 <input type="radio"/> Oui<br>02 <input type="radio"/> Non                                                                                                                                                                                                                                                                                                                                                                                                                                                                                                                                                        |
| Vos supérieurs sont-ils généralement présents dans l'établissement de santé où vous travaillez actuellement ?                | SINGLE-SELECT e23<br>01 <input type="radio"/> Oui<br>02 <input type="radio"/> Non<br>97 <input type="radio"/> Je ne sais pas                                                                                                                                                                                                                                                                                                                                                                                                                                                                                                             |
| Que ferait votre supérieur si vous vous absentiez du travail pendant plusieurs jours ?<br>I Selectionner deux                | MULTI-SELECT e24<br>01 <input type="checkbox"/> Il/Elle essaierait de savoir ce qui se passe<br>02 <input type="checkbox"/> Il/Elle ferait des remontrances<br>03 <input type="checkbox"/> Il/Elle me donnerait des conseils pour m'améliorer<br>04 <input type="checkbox"/> Il/Elle m'avertirait des conséquences<br>05 <input type="checkbox"/> Je n'aurais pas mon salaire<br>06 <input type="checkbox"/> Il/elle ferait des sanctions (avertissement, blâme, suspension, mis à pied)<br>07 <input type="checkbox"/> Je serai remplacé de ma poste<br>08 <input type="checkbox"/> Rien<br>97 <input type="checkbox"/> Autre, précisez |
| Précisez autre<br>E e24 .Contains (97)                                                                                       | TEXT e24oth<br>.....                                                                                                                                                                                                                                                                                                                                                                                                                                                                                                                                                                                                                     |
| Pensez-vous que vos suggestions sont écoutées par vos supérieurs(e)s ?                                                       | SINGLE-SELECT e25<br>01 <input type="radio"/> Oui<br>03 <input type="radio"/> Rarement<br>02 <input type="radio"/> Non<br>97 <input type="radio"/> Je ne sais pas                                                                                                                                                                                                                                                                                                                                                                                                                                                                        |

E TRAVAIL ACTUEL  
RÉFÉRENCES ETT QUALITÉ DES SERVICES RENDUS

|                                               |                                                                                                                                                                                                                                                                                                                                                                 |
|-----------------------------------------------|-----------------------------------------------------------------------------------------------------------------------------------------------------------------------------------------------------------------------------------------------------------------------------------------------------------------------------------------------------------------|
| Où referrez-vous les patients si besoin est ? | SINGLE-SELECT e26<br>01 <input type="radio"/> Hôpital national<br>02 <input type="radio"/> Hôpital régional<br>03 <input type="radio"/> Hôpital préfectoral<br>04 <input type="radio"/> Centre médico-communal<br>05 <input type="radio"/> Centre de santé amélioré<br>06 <input type="radio"/> Centre de santé<br>08 <input type="radio"/> Etablissement privé |
| Pensez-vous que votre structure sanitaire     | SINGLE-SELECT e27                                                                                                                                                                                                                                                                                                                                               |

répond aux attentes médicales des patients ?

- 01  Oui
- 02  Rarement
- 03  Non

Si vous pouviez améliorer certains aspects dans votre établissement, lequel serait le plus important ?

I SUGGÉRER DE RÉPONSE

SINGLE-SELECT

e28

- 01  Compétences du personnel
- 02  Equipements et fournitures
- 03  Médicaments et consommables
- 04  Propreté et hygiène
- 05  Effectifs du personnel
- 06  Infrastructure
- 97  Autre, précisez

Précisez autre

E e28==97

TEXT

e28oth

.....

## F PRÉFÉRENCES

Qu'est-ce qui vous a motivé à travailler dans la santé ?

I NE SUGGÉREZ PAS DE RÉPONSE

SINGLE-SELECT

f1

- 01  Avoir un travail
- 02  Avoir un emploi garanti/ la stabilité d'emploi
- 03  Avoir un travail qui paie bien
- 04  Avoir accès à d'autres sources de revenu
- 05  Avoir un meilleur statut social
- 06  Avoir une moindre charge de travail
- 07  Aider les autres
- 08  Continuer la tradition familiale
- 09  Avoir de grandes responsabilités
- 97  Autre, précisez

Précisez autre

E f1==97

TEXT

f1oth

.....

Souhaiteriez-vous changer de poste dans un prochain futur ? (Dans les 1-2 prochaines années)

SINGLE-SELECT

f2

- 01  Oui
- 02  Non

Souhaiteriez-vous changer de profession à long terme ? (Dans 3-5 ans)

SINGLE-SELECT

f4

- 01  Oui
- 02  Non

Pour quelle raison ?

E f4==1

SINGLE-SELECT

f5

- 01  Meilleur revenu/salaire
- 02  Meilleures options de carrière
- 03  Je n'aime pas mon travail
- 04  Trop de stress
- 05  Trop de charge
- 97  Autre, précisez

Précisez autre

E f5==97

TEXT

f5\_oth

.....

Souhaiteriez-vous travailler à long terme, en milieu urbain ou rural ?

SINGLE-SELECT

f3

- 01  Urbain

02  Rural

À long terme, dans quel secteur souhaitez-vous travailler ?

E f4==2

SINGLE-SELECT

f6

- 01  Gouvernement/secteur public
- 02  Secteur privé
- 03  ONG
- 04  Secteur religieux

À long terme (3-5 ans), dans quel type d'établissement souhaitez-vous travailler ?

E f4==2

SINGLE-SELECT

f7

- 01  Hôpital national
- 02  Hôpital régional
- 03  Hôpital préfectoral
- 04  Centre médico-communal
- 05  Centre de santé amélioré
- 06  Centre de santé
- 07  Poste de santé

À long terme (3-5 ans), souhaiteriez-vous travailler dans la domaine de la sante à l'étranger ?

SINGLE-SELECT

f8

- 01  Oui
- 02  Non

## G ANTÉCÉDENTS PROFESSIONNELS

Depuis combien d'années travaillez-vous dans votre profession ?

NUMERIC: INTEGER

g1

-----

I Écrivez le nombre total d'années. En cas de moins d'un an, écrivez 0

V1 self.InRange(0,70)

M1 Nombre non-valide

Avez-vous travaillé comme professionnel de la santé en dehors de la Guinée ?

SINGLE-SELECT

g2

- 01  Oui
- 02  Non

Pendant combien de temps ?

NUMERIC: INTEGER

g3

-----

I Écrivez le nombre total d'années. En cas de moins d'un an, écrivez 0

E g2==1

V1 self.InRange(0,70)

M1 Nombre non-valide

Où ?

TEXT

g4

.....

I Si c'est le cas pour plusieurs pays, écrire le pays dans lequel le séjour professionnel était le plus long.

E g2==1

Depuis combien d'années travaillez-vous dans votre profession en Guinée ?

NUMERIC: INTEGER

g5

-----

I Écrivez le nombre total d'années. En cas de moins d'un an, écrivez 0

E g2==1

V1 self.InRange(0,70)

M1 Nombre non-valide

STATIC TEXT

### *Cours de formation*

Travaillez-vous en ce moment à proximité de l'endroit où vous avez reçu votre formation professionnelle ?

SINGLE-SELECT

g7

- 01  Oui
- 02  Non



Travaillez-vous en ce moment dans la région où vous avez grandi ?

SINGLE-SELECT

g8

- 01  Oui  
02  Non

STATIC TEXT

*Enumerator pour donner des exemples de zones urbaines et rurales. S'assurer que le répondant comprend les catégories*

Avez-vous travaillé dans des établissements de santé en zone urbaine ?

SINGLE-SELECT

g9

- 01  Oui  
02  Non

Pendant combien d'années ?

NUMERIC: INTEGER

g10

I Écrivez le nombre total d'années. En cas de moins d'un an, écrivez 0

E g9==1

V1 self.InRange(0,70)

M1 Nombre non-valide

-----

Avez-vous travaillé dans des établissements de santé en zone rurale ?

SINGLE-SELECT

g11

- 01  Oui  
02  Non

Pendant combien d'années ?

NUMERIC: INTEGER

g12

I Écrivez le nombre total d'années. En cas de moins d'un an, écrivez 0

E g11==1

V1 self.InRange(0,70)

M1 Nombre non-valide

-----

STATIC TEXT

*L'enquêteuse doit donner des exemples locaux d'hôpital national, d'hôpital régional, d'hôpital préfectoral, de centres médico-communiaux, de centres de santé et de postes de santé que la personne interrogée peut connaître. Veuillez à ce que la personne comprenne les catégories.*

Avez-vous travaillé dans les hôpitaux nationaux ?

SINGLE-SELECT

g13

- 01  Oui  
02  Non

Pendant combien d'années ?

NUMERIC: INTEGER

g14

I Écrivez le nombre total d'années. En cas de moins d'un an, écrivez 0

E g13==1

V1 self.InRange(0,70)

M1 Nombre non-valide

-----

Avez-vous travaillé dans les hôpitaux régionaux ?

SINGLE-SELECT

g15

- 01  Oui  
02  Non

Pendant combien d'années ?

NUMERIC: INTEGER

g16

I Écrivez le nombre total d'années. En cas de moins d'un an, écrivez 0

E g15==1

V1 self.InRange(0,70)

M1 Nombre non-valide

-----

Avez-vous travaillé dans les hôpitaux préfectoraux ou dans les centres médico-communiaux ?

SINGLE-SELECT

g17

- 01  Oui  
02  Non

Pendant combien d'années ?

NUMERIC: INTEGER

g18

I Écrivez le nombre total d'années. En cas de moins d'un an, écrivez 0

-----

|                                                                                                                                                                                          |                                                                                   |
|------------------------------------------------------------------------------------------------------------------------------------------------------------------------------------------|-----------------------------------------------------------------------------------|
| E g17==1<br>V1 self.InRange(0,70)<br>M1 Nombre non-valide                                                                                                                                |                                                                                   |
| Avez-vous travaillé dans les centres de santé ?                                                                                                                                          | SINGLE-SELECT g19<br>01 <input type="radio"/> Oui<br>02 <input type="radio"/> Non |
| Pendant combien d'années ?<br>I Écrivez le nombre total d'années. En cas de moins d'un an, écrivez 0<br>E g19==1<br>V1 self.InRange(0,70)<br>M1 Nombre non-valide                        | NUMERIC: INTEGER g20<br>-----                                                     |
| Avez-vous travaillé dans les postes de santé ?                                                                                                                                           | SINGLE-SELECT g21<br>01 <input type="radio"/> Oui<br>02 <input type="radio"/> Non |
| Pendant combien d'années ?<br>I Écrivez le nombre total d'années. En cas de moins d'un an, écrivez 0<br>E g21==1<br>V1 self.InRange(0,70)<br>M1 Nombre non-valide                        | NUMERIC: INTEGER g22<br>-----                                                     |
| En tout, combien de fois avez-vous changé de structure sanitaire au cours de votre carrière en Guinée ?<br>I Écrivez le nombre de transferts. Écrire "0" si aucun transfert n'a eu lieu. | NUMERIC: INTEGER g23<br>-----                                                     |
| En tout, combien de fois avez-vous changé de postes au cours de votre carrière en Guinée ?<br>I Écrivez le nombre de transferts. Écrire "0" si aucun transfert n'a eu lieu.              | NUMERIC: INTEGER g24<br>-----                                                     |
| Avez-vous travaillé dans des établissements de santé privés ?                                                                                                                            | SINGLE-SELECT g25<br>01 <input type="radio"/> Oui<br>02 <input type="radio"/> Non |
| Pendant combien d'années ?<br>I Écrivez le nombre total d'années. En cas de moins d'un an, écrivez 0<br>E g25==1<br>V1 self.InRange(0,70)<br>M1 Nombre non-valide                        | NUMERIC: INTEGER g26<br>-----                                                     |

## H REVENU ET DÉPENSES

### H REVENU ET DÉPENSES REVENU

|                                                                                                                                                                         |                              |
|-------------------------------------------------------------------------------------------------------------------------------------------------------------------------|------------------------------|
| Quel est votre salaire brut par mois ?<br>I Écrire le montant en milliers de FG 99998 Je ne sais pas<br>V1 self.InRange(0,20000)    self==99998<br>M1 Nombre non-valide | NUMERIC: INTEGER h1<br>----- |
| Quel est votre salaire net par mois ?                                                                                                                                   | NUMERIC: INTEGER h2          |

|                                                                                                                               |       |
|-------------------------------------------------------------------------------------------------------------------------------|-------|
| I Écrire le montant en milliers de FG 99998 Je ne sais pas<br>V1 self.InRange(0,20000)    self==99998<br>M1 Nombre non-valide | ----- |
|-------------------------------------------------------------------------------------------------------------------------------|-------|

STATIC TEXT

*Au cours d'un mois normal, combien recevez-vous des paiements supplémentaires officiels suivants?*

**INSTRUCTION**

*Écrire le montant en milliers GNF. Enregistrez le montant de la fiche de paie  
Écrivez '0' si aucun*

|                                                                      |                              |
|----------------------------------------------------------------------|------------------------------|
| Aide au transport<br>V1 self.InRange(0,2000)<br>M1 Nombre non-valide | NUMERIC: INTEGER h7<br>----- |
|----------------------------------------------------------------------|------------------------------|

|                                                                     |                              |
|---------------------------------------------------------------------|------------------------------|
| Aide au logement<br>V1 self.InRange(0,2000)<br>M1 Nombre non-valide | NUMERIC: INTEGER h6<br>----- |
|---------------------------------------------------------------------|------------------------------|

|                                                                                   |                              |
|-----------------------------------------------------------------------------------|------------------------------|
| Autres indemnités régulières ?<br>V1 self.InRange(0,2000)<br>M1 Nombre non-valide | NUMERIC: INTEGER h8<br>----- |
|-----------------------------------------------------------------------------------|------------------------------|

|                                                                       |                               |
|-----------------------------------------------------------------------|-------------------------------|
| Primes de risque ?<br>V1 self.InRange(0,2000)<br>M1 Nombre non-valide | NUMERIC: INTEGER h10<br>----- |
|-----------------------------------------------------------------------|-------------------------------|

|                                                                                     |                               |
|-------------------------------------------------------------------------------------|-------------------------------|
| Indemnité journalière/ per diems<br>V1 self.InRange(0,2000)<br>M1 Nombre non-valide | NUMERIC: INTEGER h12<br>----- |
|-------------------------------------------------------------------------------------|-------------------------------|

|                                                                                                                |                               |
|----------------------------------------------------------------------------------------------------------------|-------------------------------|
| Paiements basés sur la performance/<br>paiements incitatifs<br>V1 self.InRange(0,2000)<br>M1 Nombre non-valide | NUMERIC: INTEGER h14<br>----- |
|----------------------------------------------------------------------------------------------------------------|-------------------------------|

|                                                                                      |                               |
|--------------------------------------------------------------------------------------|-------------------------------|
| Recevez-vous d'autres indemnités?<br>V1 self.InRange(0,2000)<br>M1 Nombre non-valide | NUMERIC: INTEGER h15<br>----- |
|--------------------------------------------------------------------------------------|-------------------------------|

|                            |                   |
|----------------------------|-------------------|
| Précisez le but<br>E h15>0 | TEXT h16<br>----- |
|----------------------------|-------------------|

|                                                                                                                                                                                                   |                              |
|---------------------------------------------------------------------------------------------------------------------------------------------------------------------------------------------------|------------------------------|
| Dans les 12 derniers mois, combien de fois<br>votre salaire a-t-il été payé en retard ?<br>I Écrire 0, si le salaire a toujours été reçu à temps<br>V1 self.InRange(0,12)<br>M1 Nombre non-valide | NUMERIC: INTEGER h4<br>----- |
|---------------------------------------------------------------------------------------------------------------------------------------------------------------------------------------------------|------------------------------|

|                                                                                                                                                                                   |                              |
|-----------------------------------------------------------------------------------------------------------------------------------------------------------------------------------|------------------------------|
| Dans les 12 derniers mois, combien de fois le<br>salaire n'a-t-il pas été payé ?<br>I Écrire 0 si le salaire a toujours été reçu<br>V1 self.InRange(0,12)<br>M1 Nombre non-valide | NUMERIC: INTEGER h5<br>----- |
|-----------------------------------------------------------------------------------------------------------------------------------------------------------------------------------|------------------------------|

H REVENU ET DÉPENSES

## DONS DE PATIENTS ET TRAVAIL PRIVÉ

|                                                                                                                                                     |                                                                                                                                                                                                                                                                                                                                                                               |
|-----------------------------------------------------------------------------------------------------------------------------------------------------|-------------------------------------------------------------------------------------------------------------------------------------------------------------------------------------------------------------------------------------------------------------------------------------------------------------------------------------------------------------------------------|
| <p>Dans les établissements publics, est-ce une pratique courante que les clients paient directement aux agents de santé pour les services?</p>      | <p>SINGLE-SELECT <span style="float: right;">h17</span></p> <p>01 <input type="radio"/> Oui</p> <p>02 <input type="radio"/> Non</p>                                                                                                                                                                                                                                           |
| <p>Les prix sont-ils affichés de façon visible pour les patients?</p>                                                                               | <p>SINGLE-SELECT <span style="float: right;">h17a</span></p> <p>01 <input type="radio"/> Oui</p> <p>03 <input type="radio"/> Certains</p> <p>02 <input type="radio"/> Non</p>                                                                                                                                                                                                 |
| <p>Les patients sont-ils informés d'avance qu'il y a ces prix à payer?</p>                                                                          | <p>SINGLE-SELECT <span style="float: right;">h17b</span></p> <p>01 <input type="radio"/> Oui</p> <p>02 <input type="radio"/> Non</p>                                                                                                                                                                                                                                          |
| <p>Est-ce normal, dans le établissements de santé publics, de faire payer les patients pour améliorer our accélérer les services rendus?</p>        | <p>SINGLE-SELECT <span style="float: right;">h17c</span></p> <p>01 <input type="radio"/> Oui</p> <p>03 <input type="radio"/> Rarement</p> <p>02 <input type="radio"/> Non</p> <p>98 <input type="radio"/> Je ne veux pas dire</p>                                                                                                                                             |
| <p>En une semaine normale, quel revenu un professionnel de la santé peut-il gagner des contributions de patients dans un établissement public ?</p> | <p>NUMERIC: INTEGER <span style="float: right;">h18</span></p> <p>-----</p>                                                                                                                                                                                                                                                                                                   |
| <p>I Écrire le montant en milliers de FG</p> <p>E h17==1</p> <p>V1 self.InRange(0,5000)</p> <p>M1 Nombre non-valide</p>                             |                                                                                                                                                                                                                                                                                                                                                                               |
| <p>Comment voyez-vous les contributions faites par les patients ?</p>                                                                               | <p>SINGLE-SELECT <span style="float: right;">h19</span></p> <p>01 <input type="radio"/> Ce n'est pas juste / Je ne me sens</p> <p>02 <input type="radio"/> C'est toléré / c'est normal ici</p> <p>03 <input type="radio"/> Les contributions sont importantes / Elles sont méritées</p> <p>97 <input type="radio"/> Autre, précisez</p>                                       |
| <p>I NE SUGGÉREZ PAS DE RÉPONSE</p> <p>E h17==1</p>                                                                                                 |                                                                                                                                                                                                                                                                                                                                                                               |
| <p>Précisez autre</p>                                                                                                                               | <p>TEXT <span style="float: right;">h19oth</span></p> <p>-----</p>                                                                                                                                                                                                                                                                                                            |
| <p>E h17==1 &amp;&amp; h19==97</p>                                                                                                                  |                                                                                                                                                                                                                                                                                                                                                                               |
| <p>Dans les établissements de santé publics, et-il courant de recevoir des cadeaux en nature de la part des patients ?</p>                          | <p>SINGLE-SELECT <span style="float: right;">h20</span></p> <p>01 <input type="radio"/> Oui</p> <p>02 <input type="radio"/> Non</p>                                                                                                                                                                                                                                           |
| <p>Quel genre de cadeaux en nature les patients apportent, ils aux professionnels de santé ?</p>                                                    | <p>MULTI-SELECT <span style="float: right;">h21</span></p> <p>01 <input type="checkbox"/> Légumes/denrées de base/Fruits/Viande/Produits laitiers</p> <p>02 <input type="checkbox"/> Tissu</p> <p>03 <input type="checkbox"/> Cartes de crédit du portable</p> <p>04 <input type="checkbox"/> Produits de beauté/savon</p> <p>97 <input type="checkbox"/> Autre, précisez</p> |
| <p>I NE SUGGÉREZ PAS DE REPONSE. PLUSIEURS RÉPONSES POSSIBLES</p> <p>E h20==1</p>                                                                   |                                                                                                                                                                                                                                                                                                                                                                               |
| <p>Précisez autre</p>                                                                                                                               | <p>TEXT <span style="float: right;">h21oth</span></p> <p>-----</p>                                                                                                                                                                                                                                                                                                            |
| <p>E h20==1 &amp;&amp; h21.Contains(97)</p>                                                                                                         |                                                                                                                                                                                                                                                                                                                                                                               |
| <p>Quels sont vos sentiments à ce sujet ?</p>                                                                                                       | <p>SINGLE-SELECT <span style="float: right;">h23</span></p>                                                                                                                                                                                                                                                                                                                   |

I NE SUGGÉREZ PAS DE RÉPONSE  
E h20==1

- 01  Ce n'est pas juste / Je ne me sens  
02  C'est toléré / c'est normal ici  
03  Les contributions sont importantes / Elles sont méritées  
97  Autre, précisez

Précisez autre

TEXT h23oth

E h23==97

Est-il courant d'offrir des consultations privées aux patients en dehors des heures de travail ?

SINGLE-SELECT h24

- 01  Oui  
02  Non

Au cours d'une semaine normale, combien pensez-vous qu'on peut gagner avec ces consultations privées ?

NUMERIC: INTEGER h25

-----

I Écrire le montant en milliers de FG

E h24==1

V1 self.InRange(0,50000)

M1 Nombre non-valide

## H REVENU ET DÉPENSES REVENUS SUPPLÉMENTAIRES

Est-il courant d'avoir des activités génératrices de revenus comme l'agriculture, en plus de travailler dans le secteur de la santé ?

SINGLE-SELECT h26

- 01  Oui  
02  Non

Quelle importance accordez-vous au revenu du travail dans l'établissement public, comparé à d'autres sources de revenus tels que l'agriculture, l'élevage ou d'autres activités génératrices de revenus dans le ménage du professionnel de santé?

SINGLE-SELECT h27

- 01  C'est la source principale de revenu du ménage  
02  D'autres activités telles que l'agriculture, l'élevage ou autres sont la source principale de revenus du ménage  
03  Ces activités on la même importance que le travail dans l'établissement de santé  
97  Autre, précisez

E h26==1

Précisez autre

TEXT h27oth

E h27==97

## H REVENU ET DÉPENSES DÉPENSES DU MÉNAGE

Vivez-vous avec votre époux(se)/partenaire ?

SINGLE-SELECT h28

- 01  Oui  
02  Non

Est-ce que votre époux(se) est salarié(e) ou travaille à son compte ?

SINGLE-SELECT h30

- 01  À son compte  
02  Salarié(e)  
03  Mon époux(se) ne travaille pas

E h28==1

Combien d'argent gagne votre époux(se) par semaine ?

NUMERIC: INTEGER h31

|                                                                                                                                                                                      |                                                                                                                                                                                                                                                                                                                                                                                                                                                                                                        |
|--------------------------------------------------------------------------------------------------------------------------------------------------------------------------------------|--------------------------------------------------------------------------------------------------------------------------------------------------------------------------------------------------------------------------------------------------------------------------------------------------------------------------------------------------------------------------------------------------------------------------------------------------------------------------------------------------------|
| <p>I Écrire le montant en milliers de FG 99998 Je ne sais pas<br/>E h30==1<br/>V1 self.InRange(0,1250)    self==99998</p>                                                            | <p>-----</p>                                                                                                                                                                                                                                                                                                                                                                                                                                                                                           |
| <p>Combien d'argent gagne votre époux(se) par mois ?<br/><br/>I Écrire le montant en milliers de FG 99998 Je ne sais pas<br/>E h30==2<br/>V1 self.InRange(0,5000)    self==99998</p> | <p>NUMERIC: INTEGER h32<br/><br/>-----</p>                                                                                                                                                                                                                                                                                                                                                                                                                                                             |
| <p>Combien de personnes contribuent au revenu mensuel de votre ménage ?<br/><br/>V1 self.InRange(0,21)<br/>M1 Nombre non-valide</p>                                                  | <p>NUMERIC: INTEGER h29<br/><br/>-----</p>                                                                                                                                                                                                                                                                                                                                                                                                                                                             |
| <p>Combien de personnes dépendant financièrement de vous vivent dans votre ménage ?<br/><br/>V1 self.InRange(0,40)</p>                                                               | <p>NUMERIC: INTEGER h34<br/><br/>-----</p>                                                                                                                                                                                                                                                                                                                                                                                                                                                             |
| <p>Quelle est la plus importante dépense de votre ménage ?<br/><br/>I Ne suggérez pas de réponse</p>                                                                                 | <p>SINGLE-SELECT h35<br/>01 <input type="radio"/> Frais scolaire/uniformes<br/>02 <input type="radio"/> Événements du cycle de la vie (mariages, baptêmes, décès par ex.)<br/>03 <input type="radio"/> Frais médicaux/médicaments<br/>04 <input type="radio"/> Intrants agricoles<br/>05 <input type="radio"/> Nourriture<br/>06 <input type="radio"/> Loyer<br/>07 <input type="radio"/> Transport<br/>98 <input type="radio"/> Ne veux pas répondre<br/>97 <input type="radio"/> Autre, précisez</p> |
| <p>Précisez autre<br/><br/>E h35==97</p>                                                                                                                                             | <p>TEXT h35oth<br/><br/>-----</p>                                                                                                                                                                                                                                                                                                                                                                                                                                                                      |
| <p>Comment supportez-vous principalement cette dépense en gros ?<br/><br/>I NE SUGGEREZ PAS DE REPONSE.</p>                                                                          | <p>SINGLE-SELECT h36<br/>01 <input type="radio"/> Crédit: famille/amis<br/>02 <input type="radio"/> Crédit: avance sur salaires<br/>03 <input type="radio"/> Épargnes<br/>04 <input type="radio"/> Vente de biens<br/>05 <input type="radio"/> Frais sont couverts par mon salaire<br/>06 <input type="radio"/> Réduction des dépenses<br/>07 <input type="radio"/> Prêts bancaires<br/>99 <input type="radio"/> Ne veux pas répondre<br/>97 <input type="radio"/> Autre, précisez</p>                 |
| <p>Précisez autre<br/><br/>E h36==97</p>                                                                                                                                             | <p>TEXT h36oth<br/><br/>-----</p>                                                                                                                                                                                                                                                                                                                                                                                                                                                                      |
| <p>Votre ménage parvient-il à couvrir ces dépenses de base chaque semaine ?<br/><br/>I NE SUGGÉREZ PAS DE RÉPONSE</p>                                                                | <p>SINGLE-SELECT h37<br/>01 <input type="radio"/> Oui, toujours<br/>02 <input type="radio"/> La plupart du temps<br/>03 <input type="radio"/> Rarement<br/>04 <input type="radio"/> Jamais<br/>99 <input type="radio"/> Je ne veux pas dire</p>                                                                                                                                                                                                                                                        |

|                                                                                                                                                           |                                                                                                                                                                                                      |
|-----------------------------------------------------------------------------------------------------------------------------------------------------------|------------------------------------------------------------------------------------------------------------------------------------------------------------------------------------------------------|
| Combien de jours de congés avez-vous par an ?                                                                                                             | NUMERIC: INTEGER h38                                                                                                                                                                                 |
| <p>I Écrivez le nombre de jours par an.</p> <p>V1 <code>self.InRange(0, 90)</code></p> <p>M1 Nombre non-valide</p>                                        | -----                                                                                                                                                                                                |
| Votre emploi vous fournit-il un logement ?                                                                                                                | SINGLE-SELECT h39                                                                                                                                                                                    |
|                                                                                                                                                           | <p>01 <input type="radio"/> Oui</p> <p>02 <input type="radio"/> Non</p>                                                                                                                              |
| Quelle est l'état de ce logement ?                                                                                                                        | SINGLE-SELECT h40                                                                                                                                                                                    |
| <p>I Suggérez des réponses</p> <p>E <code>h39==1</code></p>                                                                                               | <p>01 <input type="radio"/> Excellent</p> <p>02 <input type="radio"/> Bon</p> <p>03 <input type="radio"/> Décent</p> <p>04 <input type="radio"/> Pauvre</p> <p>05 <input type="radio"/> Terrible</p> |
| Au cours d'une semaine normale, à quelle fréquence utilisez-vous le logement qui vous est fourni ?                                                        | NUMERIC: INTEGER h41                                                                                                                                                                                 |
| <p>I Écrivez le nombre de nuits par semaine.</p> <p>E <code>h39==1</code></p> <p>V1 <code>self.InRange(0, 7)</code></p> <p>M1 Nombre non-valide</p>       | -----                                                                                                                                                                                                |
| Utilisez-vous un mode de transport pour exécuter votre travail ? (par exemple, motocyclette/voiture)                                                      | SINGLE-SELECT h42                                                                                                                                                                                    |
|                                                                                                                                                           | <p>01 <input type="radio"/> Oui</p> <p>02 <input type="radio"/> Non</p>                                                                                                                              |
| Recevez-vous assez de carburant ou d'aide au carburant de la part de votre établissement afin d'utiliser une motocyclette ou voiture pour votre travail ? | SINGLE-SELECT h43                                                                                                                                                                                    |
| E <code>h42==1</code>                                                                                                                                     | <p>01 <input type="radio"/> Oui, toujours</p> <p>02 <input type="radio"/> La plupart du temps</p> <p>03 <input type="radio"/> Rarement ou jamais</p>                                                 |

## I ABSENTÉISME

|                                                                                                                     |                                                                                                                                                                                                                                                                                                                                                                                                        |
|---------------------------------------------------------------------------------------------------------------------|--------------------------------------------------------------------------------------------------------------------------------------------------------------------------------------------------------------------------------------------------------------------------------------------------------------------------------------------------------------------------------------------------------|
| En général, vos collègues dans cet établissement sont-ils souvent absents au travail ?                              | SINGLE-SELECT i1                                                                                                                                                                                                                                                                                                                                                                                       |
| I Plus d'un quart                                                                                                   | <p>01 <input type="radio"/> Oui</p> <p>02 <input type="radio"/> Non</p> <p>99 <input type="radio"/> Je ne veux pas dire</p>                                                                                                                                                                                                                                                                            |
| Sur un mois, combien de jours pensez-vous que vos collègues sont absents dans cet établissement ?                   | NUMERIC: INTEGER i2                                                                                                                                                                                                                                                                                                                                                                                    |
| <p>I 99998 Je ne sais pas</p> <p>V1 <code>self.InRange(0, 30)    self==99998</code></p> <p>M1 Nombre non-valide</p> | -----                                                                                                                                                                                                                                                                                                                                                                                                  |
| Quelle est la raison principale, d'après vous ?                                                                     | SINGLE-SELECT i3                                                                                                                                                                                                                                                                                                                                                                                       |
| I NE SUGGEREZ PAS DE REPONSE.                                                                                       | <p>00001 <input type="radio"/> Domicile éloigné du lieu de travail</p> <p>00002 <input type="radio"/> Maladie</p> <p>00003 <input type="radio"/> Membre de la famille malade</p> <p>00004 <input type="radio"/> Autre emploi</p> <p>00005 <input type="radio"/> Consultation privée</p> <p>00006 <input type="radio"/> Raison familiale</p> <p>00007 <input type="radio"/> Obligations domestiques</p> |

- 00008  Fatigué(e) des jours précédents  
 00097  Autre, précisez  
 99998  Je ne sais pas

|                                                                                                                                                                                                                                                    |                                                                                                                                                                                                                                                                                                                                                                                                                                                                                                                                                                                                                                                                                                                                                            |
|----------------------------------------------------------------------------------------------------------------------------------------------------------------------------------------------------------------------------------------------------|------------------------------------------------------------------------------------------------------------------------------------------------------------------------------------------------------------------------------------------------------------------------------------------------------------------------------------------------------------------------------------------------------------------------------------------------------------------------------------------------------------------------------------------------------------------------------------------------------------------------------------------------------------------------------------------------------------------------------------------------------------|
| <p>Précisez autre</p> <p>E i3==97</p>                                                                                                                                                                                                              | <p>TEXT <span style="float: right;">i3oth</span></p> <p>.....</p>                                                                                                                                                                                                                                                                                                                                                                                                                                                                                                                                                                                                                                                                                          |
| <p>Pensez-vous travailler plus ou moins de jours que vos collègues ?</p>                                                                                                                                                                           | <p>SINGLE-SELECT <span style="float: right;">i4</span></p> <p>01 <input type="radio"/> Plus<br/>       02 <input type="radio"/> Même<br/>       03 <input type="radio"/> Moins<br/>       99 <input type="radio"/> NA</p>                                                                                                                                                                                                                                                                                                                                                                                                                                                                                                                                  |
| <p>Dans les 30 derniers jours, avez-vous été absent au travail pour cause de maladie ? Combien de jours?</p> <p>I Écrire le nombre de jours, indiquez 0 pour 'non'</p> <p>V1 self.InRange(0,30)</p> <p>M1 Nombre non-valide</p>                    | <p>NUMERIC: INTEGER <span style="float: right;">i5</span></p> <p>-----</p>                                                                                                                                                                                                                                                                                                                                                                                                                                                                                                                                                                                                                                                                                 |
| <p>Dans les 30 derniers jours, avez-vous été absent au travail pour cause de formation, sensibilisation ou congé autorisé ?</p> <p>I Écrire le nombre de jours, indiquez 0 pour 'non'</p> <p>V1 self.InRange(0,30)</p> <p>M1 Nombre non-valide</p> | <p>NUMERIC: INTEGER <span style="float: right;">i6</span></p> <p>-----</p>                                                                                                                                                                                                                                                                                                                                                                                                                                                                                                                                                                                                                                                                                 |
| <p>Dans les 30 derniers jours, avez-vous été absent au travail pour d'autres raisons personnelles ? Combien de jours?</p> <p>I Écrire le nombre de jours, indiquez 0 pour 'non'</p> <p>V1 self.InRange(0,30)</p> <p>M1 Nombre non-valide</p>       | <p>NUMERIC: INTEGER <span style="float: right;">i7</span></p> <p>-----</p>                                                                                                                                                                                                                                                                                                                                                                                                                                                                                                                                                                                                                                                                                 |
| <p>Quelle était la raison de votre absence la dernière fois que vous avez manqué le travail pour des raisons personnelles ?</p> <p>I NE SUGGÉREZ PAS DE RÉPONSE</p>                                                                                | <p>SINGLE-SELECT <span style="float: right;">i8</span></p> <p>01 <input type="radio"/> Domicile éloigné du lieu de travail<br/>       02 <input type="radio"/> J'étais malade<br/>       03 <input type="radio"/> Membre de la famille malade<br/>       04 <input type="radio"/> Je devais aller à un autre travail<br/>       05 <input type="radio"/> Consultation privée<br/>       06 <input type="radio"/> Je dois m'occuper des enfants<br/>       07 <input type="radio"/> J'avais des tâches ménagères à faire<br/>       08 <input type="radio"/> J'étais fatigué(e) des jours précédents<br/>       99 <input type="radio"/> Jamais été absent du travail pour des raisons personnelles<br/>       97 <input type="radio"/> Autre, précisez</p> |
| <p>Précisez autre</p> <p>E i8==97</p>                                                                                                                                                                                                              | <p>TEXT <span style="float: right;">i8oth</span></p> <p>.....</p>                                                                                                                                                                                                                                                                                                                                                                                                                                                                                                                                                                                                                                                                                          |

## J SATISFACTION ET CONTRAINTES



|                                                                                                                                    |                                                                                                                                                                                                                                                           |
|------------------------------------------------------------------------------------------------------------------------------------|-----------------------------------------------------------------------------------------------------------------------------------------------------------------------------------------------------------------------------------------------------------|
| <p>Veillez évaluer votre satisfaction dans les aspects suivants de votre vie en général ?</p> <p>I Suggérez des réponses</p>       | <p>SINGLE-SELECT <span style="float: right;">j1a</span></p> <p>01 <input type="radio"/> Très satisfait(e)</p> <p>02 <input type="radio"/> Satisfait(e)</p> <p>03 <input type="radio"/> Mécontent(e)</p> <p>04 <input type="radio"/> Très mécontent(e)</p> |
| <p>Veillez évaluer votre satisfaction dans les aspects suivants de votre situation financière ?</p> <p>I Suggérez des réponses</p> | <p>SINGLE-SELECT <span style="float: right;">j1b</span></p> <p>01 <input type="radio"/> Très satisfait(e)</p> <p>02 <input type="radio"/> Satisfait(e)</p> <p>03 <input type="radio"/> Mécontent(e)</p> <p>04 <input type="radio"/> Très mécontent(e)</p> |
| <p>Veillez évaluer votre satisfaction dans les aspects suivants de votre conditions de travail ?</p>                               | <p>SINGLE-SELECT <span style="float: right;">j1d</span></p> <p>01 <input type="radio"/> Très satisfait(e)</p> <p>02 <input type="radio"/> Satisfait(e)</p> <p>03 <input type="radio"/> Mécontent(e)</p> <p>04 <input type="radio"/> Très mécontent(e)</p> |
| <p>Veillez évaluer votre satisfaction dans les aspects suivants de votre Équilibre entre travail et loisirs ?</p>                  | <p>SINGLE-SELECT <span style="float: right;">j1c</span></p> <p>01 <input type="radio"/> Très satisfait(e)</p> <p>02 <input type="radio"/> Satisfait(e)</p> <p>03 <input type="radio"/> Mécontent(e)</p> <p>04 <input type="radio"/> Très mécontent(e)</p> |
| <p>Veillez évaluer votre satisfaction dans les aspects suivants de votre opportunités de carrière ?</p>                            | <p>SINGLE-SELECT <span style="float: right;">j1e</span></p> <p>01 <input type="radio"/> Très satisfait(e)</p> <p>02 <input type="radio"/> Satisfait(e)</p> <p>03 <input type="radio"/> Mécontent(e)</p> <p>04 <input type="radio"/> Très mécontent(e)</p> |

J SATISFACTION ET CONTRAINTES  
**DÉCLARATIONS ET MOTIVATION**

|                                                                                                                                                                        |                                                                                                                                                                                                                                                              |
|------------------------------------------------------------------------------------------------------------------------------------------------------------------------|--------------------------------------------------------------------------------------------------------------------------------------------------------------------------------------------------------------------------------------------------------------|
| <p>Dans quelle mesure êtes-vous d'accord avec les phrases suivantes ? J'ai assez d'occasions pour apprendre dans mon établissement.</p> <p>I Suggérez des réponses</p> | <p>SINGLE-SELECT <span style="float: right;">j2a</span></p> <p>01 <input type="radio"/> Complètement d'accord</p> <p>02 <input type="radio"/> D'accord</p> <p>03 <input type="radio"/> En désaccord</p> <p>04 <input type="radio"/> Pas du tout d'accord</p> |
| <p>Les perspectives de carrière sont équitables et les promotions basées sur la performance.</p>                                                                       | <p>SINGLE-SELECT <span style="float: right;">j2b</span></p> <p>01 <input type="radio"/> Complètement d'accord</p> <p>02 <input type="radio"/> D'accord</p> <p>03 <input type="radio"/> En désaccord</p> <p>04 <input type="radio"/> Pas du tout d'accord</p> |
| <p>Je suis motivé(e) pour aller au travail tous les jours.</p>                                                                                                         | <p>SINGLE-SELECT <span style="float: right;">j2c</span></p> <p>01 <input type="radio"/> Complètement d'accord</p> <p>02 <input type="radio"/> D'accord</p> <p>03 <input type="radio"/> En désaccord</p> <p>04 <input type="radio"/> Pas du tout d'accord</p> |
| <p>Mon salaire est trop faible pour couvrir les dépenses de base de ma famille.</p>                                                                                    | <p>SINGLE-SELECT <span style="float: right;">j2d</span></p> <p>01 <input type="radio"/> Complètement d'accord</p> <p>02 <input type="radio"/> D'accord</p> <p>03 <input type="radio"/> En désaccord</p> <p>04 <input type="radio"/> Pas du tout d'accord</p> |
| <p>Le personnel soignant est forcé de demander aux patients de l'argent afin de gagner sa vie.</p>                                                                     | <p>SINGLE-SELECT <span style="float: right;">j2e</span></p> <p>01 <input type="radio"/> Complètement d'accord</p> <p>02 <input type="radio"/> D'accord</p> <p>03 <input type="radio"/> En désaccord</p>                                                      |

|                                                                                                                 |                                                                                                                                                                                                |     |
|-----------------------------------------------------------------------------------------------------------------|------------------------------------------------------------------------------------------------------------------------------------------------------------------------------------------------|-----|
|                                                                                                                 | 04 <input type="radio"/> Pas du tout d'accord                                                                                                                                                  |     |
| Le chômage m'inquiète.                                                                                          | SINGLE-SELECT<br>01 <input type="radio"/> Complètement d'accord<br>02 <input type="radio"/> D'accord<br>03 <input type="radio"/> En désaccord<br>04 <input type="radio"/> Pas du tout d'accord | j2f |
| Nous avons assez de médicaments et de matériel pour traiter les patients.                                       | SINGLE-SELECT<br>01 <input type="radio"/> Complètement d'accord<br>02 <input type="radio"/> D'accord<br>03 <input type="radio"/> En désaccord<br>04 <input type="radio"/> Pas du tout d'accord | j2h |
| J'ai peur d'être transféré(e) dans une autre région.                                                            | SINGLE-SELECT<br>01 <input type="radio"/> Complètement d'accord<br>02 <input type="radio"/> D'accord<br>03 <input type="radio"/> En désaccord<br>04 <input type="radio"/> Pas du tout d'accord | j2g |
| Nous avons assez de matériel en bon état de marche pour traiter les patients                                    | SINGLE-SELECT<br>01 <input type="radio"/> Complètement d'accord<br>02 <input type="radio"/> D'accord<br>03 <input type="radio"/> En désaccord<br>04 <input type="radio"/> Pas du tout d'accord | j2i |
| Quand je fais un bon travail, je me sens plus à l'aise avec moi-même.                                           | SINGLE-SELECT<br>01 <input type="radio"/> Complètement d'accord<br>02 <input type="radio"/> D'accord<br>03 <input type="radio"/> En désaccord<br>04 <input type="radio"/> Pas du tout d'accord | j2j |
| Je travaille ici parce-que le salaire correspond de manière juste aux efforts de chaque professionnel de santé. | SINGLE-SELECT<br>01 <input type="radio"/> Complètement d'accord<br>02 <input type="radio"/> D'accord<br>03 <input type="radio"/> En désaccord<br>04 <input type="radio"/> Pas du tout d'accord | j2k |
| C'est important pour moi d'avoir l'occasion d'avancer dans ma carrière.                                         | SINGLE-SELECT<br>01 <input type="radio"/> Complètement d'accord<br>02 <input type="radio"/> D'accord<br>03 <input type="radio"/> En désaccord<br>04 <input type="radio"/> Pas du tout d'accord | j2l |
| Je suis content de travailler dans cet établissement de santé plutôt que dans un autre.                         | SINGLE-SELECT<br>01 <input type="radio"/> Complètement d'accord<br>02 <input type="radio"/> D'accord<br>03 <input type="radio"/> En désaccord<br>04 <input type="radio"/> Pas du tout d'accord | j2m |
| Je me sens personnellement responsable si nous ne pouvons pas satisfaire les besoins d'un(e) patient(e).        | SINGLE-SELECT<br>01 <input type="radio"/> Complètement d'accord<br>02 <input type="radio"/> D'accord<br>03 <input type="radio"/> En désaccord<br>04 <input type="radio"/> Pas du tout d'accord | j2n |
| Je pense souvent à démissionner.                                                                                | SINGLE-SELECT<br>01 <input type="radio"/> Complètement d'accord<br>02 <input type="radio"/> D'accord<br>03 <input type="radio"/> En désaccord<br>04 <input type="radio"/> Pas du tout d'accord | j2o |
| Mes collègues sont solidaires, c'est pourquoi                                                                   | SINGLE-SELECT                                                                                                                                                                                  | j2p |

|                                                                                         |                                                                                                                                                                                                    |
|-----------------------------------------------------------------------------------------|----------------------------------------------------------------------------------------------------------------------------------------------------------------------------------------------------|
| j'aime travailler ici.                                                                  | 01 <input type="radio"/> Complètement d'accord<br>02 <input type="radio"/> D'accord<br>03 <input type="radio"/> En désaccord<br>04 <input type="radio"/> Pas du tout d'accord                      |
| Je travaille ici parce que cela représente une sécurité à long-terme.                   | SINGLE-SELECT j2q<br>01 <input type="radio"/> Complètement d'accord<br>02 <input type="radio"/> D'accord<br>03 <input type="radio"/> En désaccord<br>04 <input type="radio"/> Pas du tout d'accord |
| Je travaille ici parce qu'il y a des opportunités d'avancer ma carrière.                | SINGLE-SELECT j2r<br>01 <input type="radio"/> Complètement d'accord<br>02 <input type="radio"/> D'accord<br>03 <input type="radio"/> En désaccord<br>04 <input type="radio"/> Pas du tout d'accord |
| Je sens que par mon travail, je peux accomplir quelque chose d'important                | SINGLE-SELECT j2s<br>01 <input type="radio"/> Complètement d'accord<br>02 <input type="radio"/> D'accord<br>03 <input type="radio"/> En désaccord<br>04 <input type="radio"/> Pas du tout d'accord |
| Je travaille ici parce que cela me plait.                                               | SINGLE-SELECT j2t<br>01 <input type="radio"/> Complètement d'accord<br>02 <input type="radio"/> D'accord<br>03 <input type="radio"/> En désaccord<br>04 <input type="radio"/> Pas du tout d'accord |
| C'est difficile d'insister que le travail soit bien fait.                               | SINGLE-SELECT j2u<br>01 <input type="radio"/> Complètement d'accord<br>02 <input type="radio"/> D'accord<br>03 <input type="radio"/> En désaccord<br>04 <input type="radio"/> Pas du tout d'accord |
| Parfois, j'ai l'impression que mon travail ne vaut pas la peine.                        | SINGLE-SELECT j2v<br>01 <input type="radio"/> Complètement d'accord<br>02 <input type="radio"/> D'accord<br>03 <input type="radio"/> En désaccord<br>04 <input type="radio"/> Pas du tout d'accord |
| La reconnaissance de la communauté pour le travail que je fais est importante pour moi. | SINGLE-SELECT j2w<br>01 <input type="radio"/> Complètement d'accord<br>02 <input type="radio"/> D'accord<br>03 <input type="radio"/> En désaccord<br>04 <input type="radio"/> Pas du tout d'accord |

## K DESCRIPTION DE LA PERSONNE INTERROGÉE

|                                                                                                           |                                                                                      |
|-----------------------------------------------------------------------------------------------------------|--------------------------------------------------------------------------------------|
| Sexe                                                                                                      | SINGLE-SELECT k1<br>01 <input type="radio"/> Homme<br>02 <input type="radio"/> Femme |
| Quel est votre âge ?<br>I Écrire l'âge en années passées<br>V1 self.InRange(0,80)<br>M1 Nombre non-valide | NUMERIC: INTEGER k2<br>-----                                                         |
| Quel est votre statu matrimoniale?                                                                        | SINGLE-SELECT k3<br>01 <input type="radio"/> Célibataire                             |

|                                                                                                                  |                                                                                                                                                                                                                                                                                                                                                   |
|------------------------------------------------------------------------------------------------------------------|---------------------------------------------------------------------------------------------------------------------------------------------------------------------------------------------------------------------------------------------------------------------------------------------------------------------------------------------------|
|                                                                                                                  | 02 <input type="radio"/> Fiancé(e)<br>03 <input type="radio"/> Vit en partenariat<br>04 <input type="radio"/> Marié(e)<br>05 <input type="radio"/> Veuf ou veuve<br>06 <input type="radio"/> Divorcé/e<br>07 <input type="radio"/> Séparé/e                                                                                                       |
| Est-ce que votre époux/se ou partenaire travaille ou étudie dans le secteur de la santé ?<br>E k3.InList (2,3,4) | SINGLE-SELECT k4<br>01 <input type="radio"/> Oui<br>02 <input type="radio"/> Non                                                                                                                                                                                                                                                                  |
| Où habite votre époux(se) ou partenaire ?<br>E k3.InList (2,3,4)                                                 | SINGLE-SELECT k5<br>01 <input type="radio"/> Boké<br>02 <input type="radio"/> Conakry<br>03 <input type="radio"/> Faranah<br>04 <input type="radio"/> Kankan<br>05 <input type="radio"/> Kindia<br>06 <input type="radio"/> Labé<br>07 <input type="radio"/> Mamou<br>08 <input type="radio"/> Nzérékoré<br>09 <input type="radio"/> À l'étranger |
| Où?<br>E k3 != 1 && k5==9                                                                                        | TEXT k5oth<br>.....                                                                                                                                                                                                                                                                                                                               |
| Combien d'enfants avez-vous?<br>I Indiquez '0' si aucun.                                                         | NUMERIC: INTEGER k6<br>-----                                                                                                                                                                                                                                                                                                                      |
| Dans quelle région êtes-vous né(e) ?                                                                             | SINGLE-SELECT k7<br>01 <input type="radio"/> Boké<br>02 <input type="radio"/> Conakry<br>03 <input type="radio"/> Faranah<br>04 <input type="radio"/> Kankan<br>05 <input type="radio"/> Kindia<br>06 <input type="radio"/> Labé<br>07 <input type="radio"/> Mamou<br>08 <input type="radio"/> Nzérékoré<br>09 <input type="radio"/> À l'étranger |
| Où?<br>E k7==9                                                                                                   | TEXT k7oth<br>.....                                                                                                                                                                                                                                                                                                                               |
| Dans quelle région avez-vous grandi ?                                                                            | SINGLE-SELECT k8<br>01 <input type="radio"/> Boké<br>02 <input type="radio"/> Conakry<br>03 <input type="radio"/> Faranah<br>04 <input type="radio"/> Kankan<br>05 <input type="radio"/> Kindia<br>06 <input type="radio"/> Labé<br>07 <input type="radio"/> Mamou<br>08 <input type="radio"/> Nzérékoré<br>09 <input type="radio"/> À l'étranger |
| Où?<br>E k8==9                                                                                                   | TEXT k8oth<br>.....                                                                                                                                                                                                                                                                                                                               |
| Quel est le niveau d'instruction de votre père ?                                                                 | SINGLE-SELECT k13<br>01 <input type="radio"/> Non-scolarisé<br>03 <input type="radio"/> Éducation primaire (complété)                                                                                                                                                                                                                             |

- 04  Éducation secondaire (complété)
- 05  Diplôme ou formation professionnelle
- 06  Diplôme d'enseignement supérieur
- 99  Je ne sais pas
- 97  Autre, précisez

|                                                                                                                                                                                                                                                                          |                                                                                                                                                                                                                                                                                                                                                                                                                                                                                                                                                                                                                                                                                                                                                                                        |
|--------------------------------------------------------------------------------------------------------------------------------------------------------------------------------------------------------------------------------------------------------------------------|----------------------------------------------------------------------------------------------------------------------------------------------------------------------------------------------------------------------------------------------------------------------------------------------------------------------------------------------------------------------------------------------------------------------------------------------------------------------------------------------------------------------------------------------------------------------------------------------------------------------------------------------------------------------------------------------------------------------------------------------------------------------------------------|
| <p>Précisez autre</p> <p>E k13==97</p>                                                                                                                                                                                                                                   | <p>TEXT <span style="float: right;">k13oth</span></p> <p>-----</p>                                                                                                                                                                                                                                                                                                                                                                                                                                                                                                                                                                                                                                                                                                                     |
| <p>Quel est/était l'occupation principalee secteur d'activité de votre père ?</p>                                                                                                                                                                                        | <p>SINGLE-SELECT <span style="float: right;">k14</span></p> <ul style="list-style-type: none"> <li>01 <input type="radio"/> Ménagère</li> <li>02 <input type="radio"/> Couturier/tailleur</li> <li>03 <input type="radio"/> Commerçant/marchand</li> <li>04 <input type="radio"/> Elève/étudiant</li> <li>05 <input type="radio"/> Ouvrier (maçon, mécanicien, menuisier, électricien, peintre)</li> <li>06 <input type="radio"/> Agriculteur</li> <li>07 <input type="radio"/> Transporteur/chauffeur</li> <li>08 <input type="radio"/> Eleveur</li> <li>09 <input type="radio"/> Pêcheur</li> <li>10 <input type="radio"/> Fonctionnaire/agronome/ingénieur/enseignant</li> <li>11 <input type="radio"/> Agent de santé</li> <li>97 <input type="radio"/> Autre, précisez</li> </ul> |
| <p>Précisez autre</p> <p>E k14==97</p>                                                                                                                                                                                                                                   | <p>TEXT <span style="float: right;">k14oth</span></p> <p>-----</p>                                                                                                                                                                                                                                                                                                                                                                                                                                                                                                                                                                                                                                                                                                                     |
| <p>À qui appartenait la maison dans laquelle vous avez grandi ?</p>                                                                                                                                                                                                      | <p>SINGLE-SELECT <span style="float: right;">k15</span></p> <ul style="list-style-type: none"> <li>01 <input type="radio"/> Le ménage</li> <li>02 <input type="radio"/> La famille du chef de famille</li> <li>03 <input type="radio"/> À l'État</li> <li>04 <input type="radio"/> À une société ou entreprise privée</li> <li>05 <input type="radio"/> Propriétaire privé</li> <li>97 <input type="radio"/> Autre, précisez</li> </ul>                                                                                                                                                                                                                                                                                                                                                |
| <p>Précisez autre</p> <p>E k15==97</p>                                                                                                                                                                                                                                   | <p>TEXT <span style="float: right;">k15oth</span></p> <p>-----</p>                                                                                                                                                                                                                                                                                                                                                                                                                                                                                                                                                                                                                                                                                                                     |
| <p>Quelle est la classe socio-économique de vos parents, selon vous ?</p>                                                                                                                                                                                                | <p>SINGLE-SELECT <span style="float: right;">k12</span></p> <ul style="list-style-type: none"> <li>01 <input type="radio"/> Riche</li> <li>02 <input type="radio"/> Classe moyenne supérieure</li> <li>03 <input type="radio"/> Classe moyenne inférieure</li> <li>04 <input type="radio"/> Pauvre</li> <li>05 <input type="radio"/> Très pauvre</li> </ul>                                                                                                                                                                                                                                                                                                                                                                                                                            |
| <p>Diriez-vous que la maison dans laquelle vous avez grandi se trouve en milieu urbain ou rural ?</p>                                                                                                                                                                    | <p>SINGLE-SELECT <span style="float: right;">k16</span></p> <ul style="list-style-type: none"> <li>01 <input type="radio"/> Urbain</li> <li>02 <input type="radio"/> Rural</li> </ul>                                                                                                                                                                                                                                                                                                                                                                                                                                                                                                                                                                                                  |
| <p>À combien de kilomètres environ de la maison dans laquelle vous avez grandi se trouvait la route la plus proche praticable par tous les temps ?</p> <p>I Écrire la distance approximative en kilomètres</p> <p>V1 self.InRange(0,300)</p> <p>M1 Nombre non-valide</p> | <p>NUMERIC: INTEGER <span style="float: right;">k17</span></p> <p>-----</p>                                                                                                                                                                                                                                                                                                                                                                                                                                                                                                                                                                                                                                                                                                            |

Est-ce que la maison dans laquelle vous avez grandi comportait un des éléments suivants ?

MULTI-SELECT: YES/NO

k18

- 02  /  Réfrigérateur
- 03  /  Radio
- 04  /  Joueur de cassettes / CD
- 05  /  Télévision
- 06  /  Eau courante
- 07  /  Électricité
- 08  /  Téléphone
- 09  /  Voiture
- 10  /  Moto
- 11  /  Vélo
- 12  /  Un terrain
- 13  /  Une maison

Possédez-vous (votre ménage) un des objets suivants?

MULTI-SELECT: YES/NO

k9

- 02  /  Réfrigérateur
- 03  /  Radio
- 04  /  Joueur de cassettes / CD
- 05  /  Télévision
- 06  /  Eau courante
- 07  /  Électricité
- 08  /  Téléphone
- 09  /  Voiture
- 10  /  Moto
- 11  /  Vélo
- 12  /  Un terrain
- 13  /  Une maison

Quelle est la classe socio-économique de votre ménage, selon vous ?

SINGLE-SELECT

k12a

- 01  Riche
- 02  Classe moyenne supérieure
- 03  Classe moyenne inférieure
- 04  Pauvre
- 05  Très pauvre

Êtes-vous déjà allé(e) dans un autre pays en Afrique ?

SINGLE-SELECT

k10

- 01  Oui
- 02  Non

Êtes-vous déjà allé(e) dans un autre pays hors d'Afrique ?

SINGLE-SELECT

k11

- 01  Oui
- 02  Non

## L FIN DE L'ENTRETIEN

Heure de fin de l'entretien

DATE: CURRENT TIME

11

Résultat de l'entretien

SINGLE-SELECT

12

- 01  Complet
- 02  Incomplet
- 97  Autre, précisez

Résultat de l'entretien, autre précisez ?

TEXT

12 oth

E 12==97

.....

# LEGEND

Legend and structure of information in this file

| Name of section                                                                                                                                                                                                        | Enabling condition for this section                                                                                                                                                                                                                                                                                                                                                                                                                                                        | Type of question, scope                                                                                                                                                                                                                                                                                                                               | Variable name               |
|------------------------------------------------------------------------------------------------------------------------------------------------------------------------------------------------------------------------|--------------------------------------------------------------------------------------------------------------------------------------------------------------------------------------------------------------------------------------------------------------------------------------------------------------------------------------------------------------------------------------------------------------------------------------------------------------------------------------------|-------------------------------------------------------------------------------------------------------------------------------------------------------------------------------------------------------------------------------------------------------------------------------------------------------------------------------------------------------|-----------------------------|
| <p><b>SECTION 5: OTHER INCOME SOURCES</b></p> <p>E s4_other_sources_which.Contains(98)</p>                                                                                                                             | <p><b>Question title</b></p> <p><b>Duis aute irure dolor in reprehenderit in voluptate velit esse cillum dolore eu fugiat nulla pariatur?</b></p> <p>I This refers to family relations<br/>E s3_time_other &gt; 0<br/>V1 s4_re1_leaders_which.Contains(98)<br/>M1 Can not be itself<br/>V2 (s3_time_other_breeding_advice &lt;= (50 - s3_time_art_insem_advice))   s3_time_other_breeding_advice == 0<br/>M2 This person is not in the list<br/>F optioncode != s5_ignored_option_code</p> | <p><b>Answer options</b></p> <p>MULTI-SELECT<br/>SCOPE: PREFILLED</p> <p>01 <input type="checkbox"/> Community animal health workers<br/>02 <input type="checkbox"/> Private<br/>03 <input type="checkbox"/> Government<br/>04 <input type="checkbox"/> Livestock keepers association<br/>05 <input type="checkbox"/> NGO</p> <p>And 5 other [13]</p> | <p>s4_re1_leaders_other</p> |
| <p><b>Additional information:</b></p> <p>"I" – Question instruction<br/>"E" – Enabling condition<br/>"V1" – Validation condition №1<br/>"M1" – Message for validation №1<br/>"F" – Filter in Categorical questions</p> | <p><b>Link to full set in appendix</b></p>                                                                                                                                                                                                                                                                                                                                                                                                                                                 |                                                                                                                                                                                                                                                                                                                                                       |                             |

## Breadcrumbs

| Type or roster                        | Roster Title                                               |
|---------------------------------------|------------------------------------------------------------|
| CHAPTER 3 IDENTIFICATION /<br>Roster: | <b>LEADER RELATION DETAILS</b><br>generated by fixed list: |
| 01                                    | Ward Livestock Officer                                     |
| 02                                    | Village Livestock Officer                                  |
| 99                                    | Other (specify)                                            |

**List items**
